# Routine Single Particle CryoEM Sample and Grid Characterization by Tomography

Alex J. Noble<sup>1</sup>, Venkata P. Dandey<sup>1,\*</sup>, Hui Wei<sup>1,\*</sup>, Julia Brasch<sup>1,2</sup>, Jillian Chase<sup>3</sup>, Priyamvada Acharya<sup>1,4</sup>, Yong Zi Tan<sup>1,2</sup>, Zhening Zhang<sup>1</sup>, Laura Y. Kim<sup>1</sup>, Giovanna Scapin<sup>1,5</sup>, Micah Rapp<sup>1,2</sup>, Edward T. Eng<sup>1</sup>, William J. Rice<sup>1</sup>, Anchi Cheng<sup>1</sup>, Carl J. Negro<sup>1</sup>, Lawrence Shapiro<sup>2</sup>, Peter D. Kwong<sup>4</sup>, David Jeruzalmi<sup>3</sup>, Amédée Des Georges<sup>3</sup>, Clinton S. Potter<sup>1,2</sup>, Bridget Carragher<sup>1,2,†</sup>

\*These authors contributed equally to this work

†Corresponding author

## Affiliations:

<sup>1</sup>National Resource for Automated Molecular Microscopy, Simons Electron Microscopy Center, New York Structural Biology Center, New York, United States

<sup>2</sup>Department of Biochemistry and Molecular Biophysics, Columbia University, New York, United States

<sup>3</sup>Department of Chemistry and Biochemistry, City College of New York, New York, United States

<sup>4</sup>Vaccine Research Center, National Institute of Allergy and Infectious Diseases, National Institutes of Health, Maryland

<sup>5</sup>Department of Structural Chemistry and Chemical Biotechnology, Merck & Co., Inc., New Jersey, United States

# **Abstract**

Single particle cryo-electron microscopy (cryoEM) is often performed under the assumption that particles are freely floating away from the air-water interfaces and in thin vitreous ice. In this study, we performed fiducial-less tomography on over 50 different cryoEM grid/sample preparations to determine the particle distribution within the ice and the overall geometry of the ice in grid holes. Surprisingly, by studying particles in holes in 3D from over 1,000 tomograms, we have determined that the vast majority of particles (approximately 90%) are adsorbed to an air-water interface. The implications of this observation are wide-ranging, with potential ramifications regarding protein denaturation, conformational change, and preferred orientation. We also show that fiducial-less cryo-electron tomography on single particle grids may be used to determine ice thickness, optimal single particle collection areas and strategies, particle heterogeneity, and *de novo* models for template picking and single particle alignment.

# Introduction

For decades, single particle cryo-electron microscopy (cryoEM) grids have commonly been imaged and processed under the assumption that most particles imaged were freely floating safely between the air-water interfaces in a single layer as they were plunge frozen. An ideal grid and sample for single particle collection would have the majority of areas in holes maximally occupied by free-floating, non-interacting particles 10 nm or farther from the air-water interfaces, particles oriented randomly, vitreous ice thin enough to contain the particles plus about 20 nm of additional space, where none of the particles overlap in the beam direction, and where the beam direction is normal to the areas of interest (Figure 1). Collection in such ideal areas of a grid would then be the most efficient use of resources and would result in the highest resolution structure possible for a given number of particles, collection hardware, and collection parameters.

In practice, during single particle grid preparation and data collection there are many issues that contribute to preventing a sample from following this ideal behavior. As depicted in Figure 2, numerous combinations of air-water interface, particle, and ice behavior are possible for each hole and for regions within each hole, without taking into account surface ice contamination. Each air-water interface might be: (i) free from sample solution constituents (Figure 2, A1), (ii) covered with a layer of primary, secondary, and/or tertiary protein structures (either isolated or forming protein networks) from denatured particles (A2), or (iii) covered with one or more layers of surfactants if present during preparation (A3). It is difficult to distinguish between air-water interfaces that are clean, covered in primary protein structures, or covered in surfactants as they are likely indistinguishable by cryoEM or cryo-electron tomography (cryoET) analysis without a sample-free control for comparison (cryoET is able to resolve lipid layers at the air-water interface if high tilt angles are collected (Vos, Bomans, Frederik, & Sommerdijk, 2008)). Bulk particle behavior in regions of holes might include any combination of: (i) free-floating particles without preferred orientation (B1), (ii) particles at an air-water interface without preferred orientation (B2), (iii) particles at an air-water interface with N-preferred orientations (B3), (iv) partially denatured particles at an air-water interface with M-preferred orientations (B4), and/or (v) significantly denatured particles at an air-water interface (B5). Protein degradation in A2 might be considered to be a continuation of the denaturation in B4 and B5. Interactions between neighboring particles at the air-water interface might induce different preferred orientations in B3 and B4, particularly at high concentrations. Ice behavior for each air-water interface of each hole might be characterized by any two combinations of: convex ice (C1), flat ice (C2), concave ice where the center is thicker than the particle's minor axis (C3), and/or concave ice where the center is thinner than the particle's minor axis (C4). In the case of a convex air-water interface, the particle's minor axis might be larger than the ice thickness at the edge of the hole.

The most common technique for preparing cryoEM grids, pioneered in the labs of Robert Glaeser (Jaffe & Glaeser, 1984; Taylor & Glaeser, 1974, 1976) and Jacques Dubochet (Adrian, Dubochet, Lepault, & McDowell, 1984; J. Dubochet, Adrian, Lepault, & McDowell, 1985; J. Dubochet, Lepault, Freeman, Berriman, & Homo, 1982), involves applying about 3 microliters of purified protein in solution onto a metal grid covered by a holey substrate that has been glow-

discharged to make hydrophilic, blotting the grid with filter paper, and plunge-freezing the grid with remaining sample into a cryogen to form vitreous ice. Incubation times before and after blotting are on the order of seconds, allowing for the possibility of protein adsorption to the air-water interface due to Brownian motion. Concerns regarding deleterious air-water interface interactions with proteins have been often discussed in the literature (Jacques Dubochet et al., 1988). In a recent review by Robert Glaeser (Glaeser & Han, 2017), evidence (Trurnit, 1960) using Langmuir-Blodgett (LB) troughs (Langmuir, 1917) was used to propose that upon contact with a clean air-water interface, proteins in solution will denature, forming an insoluble, denatured protein film. This film reduces the surface tension at the air-water interface and might act as a barrier between the remaining particles in solution and the air. Particles in solution might then adsorb to the denatured layer of protein depending on the local particle affinity with the interface, thus creating an ensemble of preferred orientations. Estimates for the amount of time a particle with a mass of 100 kDa to 1 MDa in solution might take to first reach the air-water interface (bulk diffusion) range from 1 ms to 0.1 s (Naydenova & Russo, 2017; Taylor & Glaeser, 2008).

More recent literature, using LB troughs, substantiates that 10 – 1,000 mL volumes of various proteins (commonly 10 – 1,000 kDa and at  $\leq 1$  mg/mL) in buffer commonly adsorb to the air-water interface and form <10 nm thick (A. P. Gunning et al., 1996; Vliet et al., 2002) denatured viscoelastic protein network films (Birdi, 1972; Damodaran & Song, 1988; de Jongh et al., 2004; Dickinson, Murray, & Stainsby, 1988; Graham & Phillips, 1979; Yano, 2012). The time it takes for adsorption to begin due to bulk diffusion may be on the order of 0.1 to 1 ms, depending on the protein (Kudryashova, Visser, & De Jongh, 2005). For a protein that denatures at the air-water interface (surface diffusion), the surface diffusion time might be on the order of tens of milliseconds (Kudryashova et al., 2005), depending on factors including protein and concentration, surface hydrophobicity, amount of disordered structure, secondary structure, concentration of intramolecular disulfide bonds, buffer, and temperature. Higher bulk protein concentrations have been shown to increase the protein network thickness (Meinders, Bosch, & Jongh, 2001). When several proteins and/or surfactants in solution are exposed to a clean air-water interface, competitive and/or sequential adsorption may occur (Ganzevles, Fokkink, van Vliet, Cohen Stuart, & de Jongh, 2008; Le Floch-Fouéré et al., 2010; Stanimirova et al., 2014). It has been shown using atomic force microscopy (AFM) imaging of LB protein films that these protein network films may not completely denature down to individual amino acids: adding surfactants to protein solutions in which a protein network film has already formed at the air-water interface will displace the protein layer (desorption (MacRitchie, 1998)) (A. P. Gunning & Morris, 2017; Mackie, Gunning, Wilde, & Morris, 1999; Wilde, Mackie, Husband, Gunning, & Morris, 2004) and the resulting protein network segments might partially re-fold in solution (A. P. Gunning & Morris, 2017; Mackie et al., 1999; Morris & Gunning, 2008). Time-resolved AFM surfactant-protein displacement experiments for a specific protein,  $\beta$ -lactoglobulin, and different surfactants, Tween 20 and Tween 60, show that displacement of the protein network film by the surfactants occurs at equivalent surface pressures and results in non-uniform surfactant domain growth, implying that the protein network is not uniform (P. A. Gunning et al., 2004). Different surfactant displacement behavior and patterns are observed while varying only the proteins, where the degree of protein network displacement isotropy by surfactant decreases for more

ordered, globular proteins (Mackie et al., 1999). Non-uniformity of the protein network has also been seen by 3D AFM imaging of  $\beta$ -lactoglobulin LB-protein network films placed on mica (A. P. Gunning et al., 1996; Morris & Gunning, 2008). Similar experiments using LB troughs have also shown that proteins with  $\beta$ -sheets partially unfold, with the hydrophobic  $\beta$ -sheets remaining intact at the air-water interface and with potentially one or more layers of unstructured, but connected, hydrophilic amino acid strands just below the air-water interface (Yano et al., 2009). This potential for  $\beta$ -sheets to survive bulk protein denaturation is likely due to  $\beta$ -sheets commonly consisting of alternating hydrophobic and hydrophilic (polar or charged) sidechains (Zhang, Holmes, Lockshin, & Rich, 1993), with the hydrophobic sidechains orienting towards the air. Intermolecular  $\beta$ -sheets may also bind together, strengthening the protein network (A. H. Martin, Cohen Stuart, Bos, & van Vliet, 2005; Renault, Pezenec, Gauthier, Vié, & Desbat, 2002). Moreover, the number of random coils,  $\alpha$ -helices, and  $\beta$ -sheets for a protein in bulk solution might each increase or decrease when introduced to a hydrophobic environment (Reddy & Nagara, 1989; Zangi, de Vocht, Robillard, & Mark, 2002), including the air-water interface (A. H. Martin, Meinders, Bos, Cohen Stuart, & van Vliet, 2003; Yano, 2012), implying that protein conformation when adsorbed to the air-water interface could be different than when in solution (Lad, Birembaut, Matthew, Frazier, & Green, 2006; Vance, McDonald, Cooper, Smith, & Kennedy, 2013; Yano, 2012). Measurements of shear stress and compressibility of protein network films versus the internal cohesion of the constituent protein show a correlation: the more stable a protein in bulk solution, the more robust the resulting protein network film at the air-water interface (A. H. Martin et al., 2005). At high enough surface concentrations and depending on surface charge distribution, neighboring globular proteins might interact to induce additional preferred orientations as has been shown in surface-protein studies (Billsten, Wahlgren, Arnebrant, McGuire, & Elwing, 1995; Rabe, Verdes, & Seeger, 2011; Tie, Calonder, & Van Tassel, 2003). Such nearest neighbor protein-protein interactions may in turn decrease protein affinity to the interface and increase desorption. Similar effects might occur at protein-air-water interfaces.

Given the length of incubation time commonly permitted before plunging a grid for cryoEM analysis, the cross-disciplinary research discussed above suggests that some particles in a thin film on a cryoEM grid will form a viscoelastic protein network film at the air-water interface. The composition and surface profile of the resulting protein network film will vary depending on the structural integrity of the bulk protein and the bulk protein concentration. Bulk protein affinity to the protein network film will then vary depending on the local affinity between the film and the proteins. To better understand the range of particle behaviors with respect to the air-water interfaces in cryoEM grid holes, a representative ensemble of grid and sample preparations needs to be studied in three dimensions.

One method of studying single particle cryoEM grids is using cryoET. CryoET is typically practiced by adding gold fiducials to the sample preparation for tilt-series alignment, which requires additional optimization steps and might not be representative of the same sample prepared without gold fiducials. To avoid the issues imposed by gold fiducials, we have employed the fiducial-less tilt-series alignment method of Appion-Protomo (Noble & Stagg, 2015), allowing for cryoET analysis of nearly all single particle cryoEM grids we have attempted.

1 We used this fiducial-less cryoET method to investigate over 50 single particle cryoEM samples  
2 sourced from dozens of users and using grids prepared using either conventional grid  
3 preparation techniques or the new Spotiton (Jain, Sheehan, Crum, Carragher, & Potter, 2012)  
4 method. Our aim was to determine the locations of particles within the vitreous ice and the  
5 overall geometry of the ice in grid holes (related to the possible combinations in Figure 2).

6  
7 We have also found that the usefulness of performing cryoET on a single particle cryoEM grid  
8 extends beyond the goal of understanding the arrangements of particles in the ice, having  
9 additional implications with regards to optimal collection locations and strategies, single particle  
10 post-processing recommendations, understanding particle structural heterogeneity,  
11 understanding pathological particles, and *de novo* model building. We contend that cryoET  
12 should be routinely performed on single particle cryoEM grids in order to fully understand the  
13 nature of the sample on the grid and to assist with the entire single particle collection and  
14 processing workflow. We have made available a standalone Docker version of the Appion-  
15 Protomo fiducial-less tilt-series alignment suite used in these investigations at  
16 <http://github.com/nysbc/appion-protomo>.

# **Results and discussion**

The fiducial-less tomography pipeline at the New York Structural Biology Center (NYSBC) consisting of Leginon (Suloway et al., 2005, 2009) or SerialEM (Mastronarde, 2003) for tilt-series collection and Appion-Protomo (Noble & Stagg, 2015; Winkler & Taylor, 2006) for tilt-series alignment allows for the routine study of grids and samples prepared for single particle cryoEM in three dimensions. The resulting analysis sheds light on long standing questions for how single particle samples prepared using traditional methods (manual, Vitrobot, and CP3 plunging), or with new automated plunging with Spotiton (Jain et al., 2012), behave with respect to the air-water interfaces. In the following sections we report and discuss how tomography collection areas were determined and analyzed, the observation that the vast majority of particles are local to the air-water interfaces and the implications with regards to potential denaturation, the prevalence of overlapping particles in the direction orthogonal to the grid, the observation that most cryoEM imaging areas and particles are tilted several degrees with respect to the electron beam, the value of cryoET to determine optimal collection locations and strategies, the benefits of using cryoET to understand pathological particle behavior, and the use of fiducial-less cryoET for anisotropic *de novo* model generation.

## **Determination of tomography collection locations**

The single particle samples studied here were sourced from a diverse set of grids, samples, and preparation techniques. Grid substrates include carbon and gold holey films, either lacey or with a variety of regularly spaced holes, and various nanowire grids prepared using Spotiton (Razinkov et al., 2016). Plunging methods include plunging manually, with a Vitrobot (FEI Company, Hillsboro, OR) or CP3 (Gatan, Inc., Pleasanton, CA), and with Spotiton (Jain et al., 2012). With such diversity in samples and preparation techniques, we determined that the most feasible and representative collection strategy for analyzing particle and ice behaviors over dozens of preparations would be to collect in areas typical of where the sample owner intended to collect or had already collected single particle micrographs. For a typical grid, a low magnification grid atlas or montage is collected, promising squares are imaged at increasing magnifications, and potential exposure locations are examined at high magnification until sufficient particle contrast and concentration is found as determined by the sample owner. Then before or after a single particle collection, typically three or more tilt-series are collected as described in the Materials and Methods. For most grids, one or two tilt-series are collected at the center of a typical hole and one or two tilt-series are collected at the edge of a typical hole, often including the edge of the hole if the grid substrate is carbon. Tilt-series are then aligned with Appion-Protomo (Noble & Stagg, 2015; Winkler & Taylor, 2006) for analysis as described in the Materials and Methods.

## **Analysis of single particle tomograms**

Single particle tomograms of samples described in Table 1 have each been analyzed visually using 3dmod from the IMOD package (Kremer, Mastronarde, & McIntosh, 1996). After orienting a tomogram such that one of the air-water interfaces is approximately parallel to the visual



plane, traversing through the slices of the tomogram allows for determination of relative particle locations, orientations, ice thickness variations in holes, and measurement of the minimum particle distance from the air-water interfaces. Contamination on the surface of the air-water interface is used to determine the approximate location of the interface and to measure the ice thicknesses. After analyzing hundreds of single particle tomograms, we have concluded that sequestered layers of proteins in holes always correspond to an air-water interface, thus providing a second method for determining the location of the interface.

Table 1 is organized with the single particle sample mass in roughly descending order. Over 1,000 single particle tomograms of over 50 different sample preparations have been collected over a one year period. Most of these samples are reported on here. These samples include widely studied specimen such as glutamate dehydrogenase (GDH), apoferritin, T20S proteasome (samples #30-32, #34-39, and #42-44, respectively), along with various unique specimens such as a neural receptors, lipo-protein, and particles on affinity grids (samples #13, 14, #19, and #40, 41, 46, respectively). Over half of the samples were prepared on gold or carbon nanowire grids, while the remaining were prepared on a variety of carbon and gold holey grids using common cryo-plunging machines and techniques. Samples showing regions of ice in grid holes with near-ideal conditions – less than 100 nm ice thickness, no overlapping particles, and little or no preferred orientation – are highlighted in blue (21 of 46 samples; 46%) in Tables 1 and 2. Samples showing regions of ice in grid holes with ideal conditions – near-ideal conditions plus no particle-air-water interface interaction – are highlighted in green (2 of 46 samples; 4%). Over half of the samples only contained areas that are not ideal for collection due to ice thickness being greater than 100 nm, overlapping particles, and/or preferred orientation.

*Ice thickness:* Ice thickness averages  $\pm 1$  standard deviation using the minimum values, excluding intentionally thick outliers, was measured at the center and near the edge of grid holes. At the center, the ice thickness is about  $30 \pm 13$  nm for gold nanowire grids prepared with Spotiton (N = 11),  $47 \pm 40$  nm for carbon nanowire grids (N = 17), and  $56 \pm 35$  nm for carbon holey grids prepared using conventional methods (N = 10) (Figure 3A). Ice thickness about 100 nm from the edge of grid holes is about  $61 \pm 11$  nm for gold nanowire grids prepared with Spotiton (N = 4),  $107 \pm 54$  nm for carbon nanowire grids prepared with Spotiton (N = 16), and  $99 \pm 24$  nm for carbon holey grids prepared using conventional methods (N = 8) (Figure 3B).

Table 2 categorizes each sample in terms of Figure 2. Categorizations into A, B, and C, where possible, have been judged by visual inspection. Air-water interfaces that are visually clean are denoted with 'A' from Figure 2 due to A1, A2 (primary structure), and A3 being indistinguishable by cryoET without collecting high tilt angles, which was not done in this study. For particles smaller than about 100 kDa, distinguishing between A and A2 was not possible. If a region in grid holes contains layers of particles relative to the air-water interface (possibly B1 – B4), then the particle saturation of the corresponding layer is recorded in Table 2 as an approximate percentage in parentheses where 100% means that no additional particles could be fit into the layer. The angle of particle layer with respect to the electron beam is recorded for each region if applicable. The average tilt  $\pm 1$  standard deviation of layers at the centers of holes is  $4.7 \pm 3.0^\circ$  and at the edges of holes is  $6.9 \pm 3.5^\circ$  (Figure 3). About 83% of the samples contained single



particle layers ( $N = 30$ ) in the centers of holes while about 22% contained double particle layers ( $N = 8$ ; several samples have holes with single and double layers of particles in their centers). Near the edges of holes about 7% contain single particle layers ( $N = 2$ ) while about 75% contained double particle layers ( $N = 21$ ). Finally, in Table 2 the ice curvature of each air-water interface is specified using the options in Figure 2C. For these measurements, the bottom of each tomogram is defined as having lower z-slice values than the top as viewed in 3dmod, yet the relative orientation of each recorded sample is not known due to unknown sample application orientation on the grid relative to the EM stage. Thus, correlations between air-water interface behavior and sample application direction on the grids cannot be made from this study.

*Cross-sectional depictions:* Several schematic diagrams of cross-sections of particle and ice behavior in holes as determined by cryoET are shown in Figure 4 for selected samples and tomograms. Ice thickness measurements and particle sizes are approximately to scale. Each cross-section is tilted corresponding to the tilt of the tomogram from which it was derived relative to the electron beam. The cross-sectional characteristics depicted are not necessarily representative of the aggregate.

Several tomographic slice-through videos from representative imaging areas of samples are shown in the included Videos. Most of the Videos include the corresponding hole magnification image with the location of the targeted area specified. Tilt-series collection range, grid type, and collection equipment are also specified. Tomography may also be performed at hole magnification, allowing for particle location determination across multiple sized holes, ice thickness determination, and local grid tilt (Video for sample #20). For sample #20, a GPCR with a particle extent of about 5 nm, a tomographic analysis at hole magnification (about 20 Å pixelsize) is sufficient to localize ice contamination, particle layers, and to measure ice thickness with an accuracy of about 10 nm.

## **The vast majority of particles are localized to the air-water interfaces**

The primary result gleaned from over 1,000 single particle tomograms of over 50 different grid/sample preparations is that the vast majority of all particles (approximately 90%) are local to an air-water interface. As shown in Table 1, Table 2, Figure 4, and the Videos, most particles prepared with sample incubation times on the order of 1 second on the grid are within 5-10 nm of an air-water interface (ie. are characterized by B2, B3, or B4 in Table 2). This observation implies that most particles not only in this study but in cryoEM single particle studies as a whole are adsorbed to an air-water interface.

To first order approximation, a sequestered particle that is adsorbed to a clean air-water interface and that has had time to equilibrate will likely be oriented relative to that air-water interface such that the local surface hydrophobicity of the particle is maximally exposed, assuming that the particle is not prone to denaturation at the interface. If a particle is prone to denaturation at the interface and if the interface is already coated with a denatured layer of protein, then the preferred orientations of the same sequestered particle on the protein film-air-water interface might change. If the particle is not sequestered, but is in a protein-concentrated

environment, then neighboring particle-particle interactions might change the possible preferred orientations of the particles. For each of these cases, an ensemble of particles at air-water interfaces arrived at by diffusion, as is the case with most single particle cryoEM datasets, will exhibit all possible particle orientations where the percentage of particles in each preferred orientation might be mapped back onto all possible relative local particle-interface affinities. Particles that have had less time to equilibrate before observation (e.g. before plunge-freezing) will have more realized orientations in the ensemble.

Protein adsorption to an air-water interface has potential consequences with regards to protein denaturation, data collection, and image processing. In this section we will discuss the implications of protein adsorption on protein denaturation and present possible evidence of air-water interface denaturation from cryoET.

Several samples show clear protein fragments at air-water interfaces (samples #4-6, 10-14, 26, 30, 34-38, and 46; Figure 5A-E), though it is not clear whether these are from denaturation at the air-water interface, unclean preparation conditions, or protein degradation in solution. In several cases, partial particles can be seen at the air-water interface (samples #13, 34-49, 42; Figure 5A,B,F). The neural receptor, hemagglutinin, HIV-1 trimer complex 1, apoferritin, and GDH samples in particular (samples #13, #35, #4, #5, and #30, respectively) show protein fragments and domains on the air-water interfaces (Figure 5A-E and corresponding Videos). For the neural receptors, densities on the air-water interface show a clear relationship to the 13 kDa Ig-like domains that constitute the proteins. Neural receptor (sample #13) particle fragments are also seen adsorbed to the air-water interface (Figure 5A). Sample #13 consists of two distinct air-water interfaces, as can be seen in Figure 5A, where the bottom interface is covered with particles and protein fragments while the top interface is covered with protein fragments and a small number of partial particles (see also the Video for sample #13). Several apoferritin samples (samples #34-38) also show a combination of partial particles and protein fragments at the air-water interfaces (Figure 5B and Videos corresponding to samples #34-38). One hemagglutinin sample contained holes where the ice became too thin for whole particles to reside and is instead occupied exclusively by protein fragments (Figure 5C and Video of sample #4). An HIV-1 trimer sample also shows clear protein fragments on each air-water interface, although these are likely receptors intentionally introduced to solution before plunge-freezing (Figure 5D and Video of sample #5). GDH similarly shows sequestered protein fragments in open areas near particles at the air-water interface (Figure 5E and Video of sample #30). T20S proteasome interestingly shows only partial particles at the air-water interface in the less-preferred, top-down orientation (Figure 5F and Video of sample #42).

In the case of the neural receptors, the particle is composed of flexible domain repeats, which might be more susceptible to fragmentation. Also of note is that all of the domains of the neural receptor and some of the domains of apoferritin, hemagglutinin, HIV-1 trimer complex 1, and GDH are composed of series of  $\beta$ -sheets, which have the potential to not denature at the air-water interface. This observation might correlate with the cross-disciplinary literature presented in the introduction showing that  $\beta$ -sheets may potentially survive air-water interface interaction (A. H. Martin et al., 2005; Renault et al., 2002; Yano et al., 2009). It is unclear, however,

whether these unclean air-water interfaces are due to unclean preparation conditions (Glaeser et al., 2016), protein degradation in solution, or unfolding at the air-water interfaces, or a combination of these factors. The partial T20S proteasome particles shown in Figure 5F and the Video for sample #42 might be an example of protein denaturation at the air-water interface – the observed partial particles are oriented as rare top-views rather than abundant side-views of the particle and exist adjacent to areas of the air-water interface that do not harbor adsorbed particles.

While the observations described above might correlate with the research from the food science and surface physics literature as outlined in the introduction, it is not clear from this study whether all particles are adsorbed to films of denatured protein at the air-water interface or if some particles are adsorbed directly to the air-water interface. For a protein that does denature at the air-water interface, there is an additional amount of diffusion time, possibly on the order of tens of milliseconds, for surface diffusion to take place whereas proteins that adsorb directly to the air-water interface are only time limited by the bulk diffusion time of that sample preparation. The bulk diffusion time may be orders of magnitudes less than surface diffusion time. This additional surface diffusion time along with the additional bulk protein adsorption time to the denatured protein film, which is dependent on the affinity between that protein film and the bulk particles, may allow for speed advances in sample application and plunging to outrun bulk protein adsorption to the denatured proteins on the air-water interfaces depending on the grid preparation and particle behavior. Secondary effects, such as bulk particle flow – in conventional grid preparation when blotting paper is applied and in nanowire grid preparation with Spotiton when the protein solution reaches the nanowires on the grid bars and wicks away – and thermal convection may change the effective concentration of bulk particles near the air-water interfaces.

Evidence both from the literature in the introduction and from this study show that proteins do denature at air-water interfaces, with an apparent dependency on protein concentration and structural rigidity. Evidence from LB trough studies of the small, disordered protein  $\beta$ -casein additionally show that increasing the concentration of bulk proteins in solution from 0.1 to 100 mg/mL results an increased thickness of the denatured protein films at the air-water interface from 5 to 50 nm (Meinders et al., 2001). This observation implies that bulk proteins may denature not only at the air-water interface, but also at the subsequently-formed protein network film interface depending on the bulk protein concentration. This in turn implies that proteins adsorbed to the protein film undergo conformational change, at least at higher concentrations. Thus, if an increase in the thickness of a protein network film of a given protein at high concentration is observed, concern that bulk proteins adsorbed to the protein network film are undergoing conformational change might be warranted. We speculate that if particles are undergoing conformational change at either the protein-air-water interface or at the protein-protein network interface, then anomalous structures might be present after 2D and 3D classification that are practically indistinguishable from the nominal structures. These anomalous structures might contribute towards artefactual 3D reconstructions, towards lower resolutions, and/or towards lower density contributions on the peripheries of resulting 3D reconstructions. In the latter case, lower resolutions on the peripheries of the reconstruction

might also be a result of radial inaccuracies in alignment, and thus these two resolution-degrading factors would need to be decoupled on a per-sample basis before drawing conclusions. Apoferritin as shown in Figure 5B and the Videos for samples #34-38 might be an explicit example of observed conformational change if the observed particle degradation is indeed caused by air-water interface denaturation.

Several samples show an asymmetry between particle saturation at the top and bottom air-water interfaces. For example, samples #10, 12-15, 33, and 44 have particles covering one air-water interface with the other interface showing no particles, samples #4, 7, 9, 18, 32, 36, 39, 42, and 43 have more particles covering one air-water interface than the other, and samples #1, 8, 9, 16, 17, 20-22, 24-31, 39, and 45 have a roughly equal number of particles on each air-water interface (Figure 5). Particles that layer only on one air-water interface suggest that they are either sticking to the first available air-water interface (the interface on the back of the grid prior to blotting for conventional grid preparation techniques or the interface in the direction of application momentum for Spotiton), or to the first formed protein network film, which might form nearly instantaneously after the first air-water interface is created with the sample dispenser. For a particle that denatures at the air-water interface, since the bulk diffusion time is one or more orders of magnitude less than the surface diffusion time, if the second available air-water interface is formed before the first air-water interface is saturated with bulk particles and if the protein concentration is high enough, then one might expect denaturation to occur at the second air-water interface, thus allowing for a layer of particles to adsorb to each air-water interface. Further study into such sample behavior using cryoET and taking into account sample application directionality might lead to a clearer model for why particles adsorb preferentially to one air-water interface over the other.

Only two samples, #25: protein in nanodisc and #46: protein on streptavidin, exhibit ideal characteristics – less than 100 nm ice thickness, no overlapping particles, little or no preferred orientation, and no particle-air-water interface interaction. Sample #25 contains regions of single layers of particles in nanodiscs without preferred orientation in 30 nm ice (see corresponding Video). While the particle layers are on the air-water interfaces in thicker areas near the edges of holes, the lack of preferred orientation implied that some fraction of the particles are not in contact with the air-water interface, thus satisfying the ideal condition. Sample #46 contains particles dispersed on streptavidin, which is used to both randomly orient the particles and to avoid at least one air-water interface (Figure 4). The majority of areas with particles consist of ice thin enough to satisfy the ideal condition.

A single particle dataset consisting primarily of adsorbed particles to air-water interfaces not only opens up the possibility of protein and degradation conformational change as described in this section, but additionally has implications on data collection and image processing as described in the next three sections.

**A significant fraction of areas in holes have overlapping particles in the electron beam direction**

A large fraction of the samples studied here contain imaging areas in holes, often limited to near the edges of holes, where in addition to a single layer of particles at one air-water interface, there are free floating particles and/or a second layer of particles at the apposed air-water interface (denoted in Table 1 as having 1+, 2, or 2+ layers in holes) (Figure 3). When this occurs, it is often the case that projection images collected in these areas will contain overlapping particles (Figure 6A, middle and right). These overlapping particles will cause several issues. First, overlapping particles picked as one particle will need to be discarded during post-processing (particles not circled in Figure 6). If these particles are not discarded, then anomalous results might be expected in any 3D refinement containing these particles – particularly in refinement models that use maximum likelihood methods such as Relion (Scheres, 2012), cryoSPARC (Punjani, Rubinstein, Fleet, & Brubaker, 2017), and Xmipp (Scheres et al., 2006; Scheres, Núñez-Ramírez, Sorzano, Carazo, & Marabini, 2008) – thus reducing the reliability and accuracy of the refinement results. Second, overlapping particles reduce the accuracy of whole-image and per-particle defocus estimation (as depicted by particle color in Figure 6). For instance, an exposure area perpendicular to the electron beam containing two parallel layers of particles with identical concentrations will result in a whole-image defocus estimation located halfway-between the two layers, thus limiting the resolution of each particle depending on their distance from the midway point. For such an image collected with a defocus range of 1 to 2 microns and with a 10 nm deviation from the midway point, the particles will have a resolution limit of about 2.5 Å. A 50 nm deviation from the midway point will result in a resolution limit of about 6 Å. Third, overlapping particles might reduce the accuracy of per-particle or local defocus estimation. If the concentrations of overlapping particles are too high, then local and potentially per-particle defocus estimation might contain fragments of particles at different heights than the particle of interest. Fourth, overlapping particles reduce the efficiency of data processing and thus data collection. The second and the third issues posed above might be partially resolved if the ice thickness is known by duplicating each particle, correcting one with the midway defocus + thickness/2 and the other with midway defocus – thickness/2, then discarding the particle with the lower high frequency cross correlation value partway through single particle alignment. The issues posed above may be a primary source of discarded particles during mean filtering, CTF confidence filtering, 2D classification, and 3D classification.

### **Most air-water interfaces are tilted with respect to the electron beam**

We have shown that the majority of samples studied contain particles at one or both air-water interfaces (Tables 1 and 2, Figure 3). Tomography also has allowed us to study the orientation of the normal of each air-water interface with respect to the direction of the electron beam, and thus the tilt of the particles local to each air-water interface. We have found that air-water interfaces are tilted between 0° and 16° relative to the electron beam when at a nominal stage tilt of 0° (Table 2). The average tilt  $\pm 1$  standard deviation of layers at the centers of holes is  $4.8^\circ \pm 3.1^\circ$  (N = 89) and at the edges of holes is  $6.9^\circ \pm 3.5^\circ$  (N = 61) (Table 2, Figure 3, Figure 4). These tilts may be due to a combination of errors in stage orientation, local grid deformations, and/or local air-water interface curvatures. In most cases, these tilts are not systematic with respect to particle orientation in the ice, and thus contribute beneficially to angular particle coverage.



As shown previously, most particles are adsorbed to an air-water interface (Tables 1 and 2, Figure 3, Figure 4, and Videos). It is important to note that a lack of apparent preferred orientation in single particle micrographs does not imply that the particles are not adsorbed to the air-water interfaces. Indeed, most of the particles listed in Tables 1 and 2 that have no apparent preferred orientations are adsorbed to the air-water interfaces. A distinction should be made between preferred orientation and apparent preferred orientation of particles. A particle may have N and/or M preferred orientations on the grid as shown in Figure 2B, possibly dependent on the surface hydrophobicity of the particle. Collection on a given grid with non-zero tilts effectively increases the number of imaged preferred orientations of the particle. Depending on the numbers N and/or M, the locations of the preferred orientations on the particle, the symmetry of the particle, and the range of non-zero tilts on the grid, a preferentially oriented particle might have no apparent preferred orientations in a full single particle dataset. As a hypothetical example, both T20S proteasome and apoferritin might have two preferred orientations each, yet T20S proteasome may appear to have a small number of preferred orientations while apoferritin may appear to have no preferred orientations when micrographs are collected with a nominal tilt of zero degrees, but with non-zero degree local air-water interface tilts. This would be due to apoferritin having a high number of uniformly distributed asymmetric units and  $\sim 10^\circ$  tilts in the exposure areas.

The potential effect of tilted particle layers on CTF estimation, and thus resolution limit, of a single particle cryoEM dataset can be nearly as harmful as there being a layer of particles at each air-water interface, as described in the previous section and depicted in Figure 6. Figure 6B depicts the additional effects imposed by air-water interface and thus particle layer tilts. CTF correction on individual particles using defocus estimation on whole fields of view will limit the resolution of particles above and below the corrected defocus (Figure 6B, left and middle) and will alleviate the resolution limit of some particles in thicker areas (Figure 6B, middle and right). Additionally, areas of thick ice that are tilted might change which particles are uniquely identifiable (Figure 6, right). As a hypothetical example, consider a micrograph with a single particle layer in the exposure area and a particle layer tilt of  $10^\circ$  collected at 1 Å pixelsize on a 4k x 4k camera with a defocus range of 1 to 2 microns. If the CTF for this micrograph is estimated and corrected for on a whole-image basis, then the worst-corrected particles will have a resolution limit of around 4 Å. These particles might be down-weighted or removed during processing, effectively decreasing the efficiency of the collection.

Several datasets in Tables 1 and 2 exhibit both of the issues described in this section and in the previous section: overlapping particles in the direction of the electron beam and tilted exposure areas (Figure 6B). Most of these locations are near hole edges where the ice is often curved and thicker. It is not uncommon for a user to collect single particle micrographs near the edges of holes in order to maximize the collection area in each hole, to avoid the potentially greater beam-induced motion in the center of the holes, and/or to avoid the thin center of holes that are more prone to melting during exposure. Without previously characterizing the sample in the grid holes by cryoET, collection in these areas might severely limit the number of alignable particles due to projection overlap, the resolution due to CTF estimation and correction error, and the



signal due to ice thickness. Thus, for many samples it is advisable to first determine the distance from the edge of a representative grid hole to collect in order to reliably image single layered particles in thin ice. Doing so will increase the signal due to ice thickness and the reliability and efficiency of single particle alignment and classification due to there being no overlapping particles. CTF estimation and correction should also be performed with the assumption that the field of view is tilted relative to the electron beam (see Figure 3), either by performing estimation and correction with whole-image CTF tilt processing, local CTF processing, or per-particle CTF processing. If the ice in thinner areas in the centers of holes is prone to melting, then one solution might be to image at a lower dose rate.

## **Fiducial-less cryoET may be used to determine optimal single particle collection areas and strategies**

As shown in Table 1 and Figure 3, ice thickness in holes is commonly greater at the edges than in the centers. Most samples that have this ice behavior have a single layer of particles on one air-water interface, with either a second layer on the apposed air-water interface or additional free floating particles, or both (Figure 3). At a certain distance from the edge of the holes (usually between 100 to 500 nm from the edge) the ice commonly becomes thin enough for only one layer of particles to fit between – usually the particle’s minor axis plus 10 to 20 nm of space between the particles and the air-water interfaces. Provided that particle concentration is high enough for accurate CTF estimation, specimen drift is low enough for sufficient correction, and the particles have little or no apparent preferred orientation, then collection a certain distance away from the edges of these holes would be the most efficient use of resources and would be less likely to result in anomalous structures compared with collecting in thicker areas with overlapping particles in projections (Figure 7, left). If in the same case the particles show preferred orientations in tomography, then the second most efficient and accurate collection method would be collecting while intentionally tilting the stage (Tan et al., 2017), provided that the sample drift is sufficiently low and the concentration is not so high that neighboring particles begin to overlap in the tilted projections (Figure 7, middle).

However, if the ice is consistently thick across the holes and across the grid, and/or there is a significant number of overlapping particles in the direction of the electron beam, then it might be determined from cryoET that the sample is not fit for high resolution collection (Figure 7, right). If the type of grid used is lacey, then tomography at hole magnification where the imaging area includes several hole sizes may be used to determine hole sizes with thinner ice and to determine if there are one or two particle layers in these areas (Video for sample #20, deposition data for sample #36).

Routinely performing cryoET on cryoEM grids, particularly those with questionable specimen or ice conditions, allows for sample owners to determine where and how to collect optimal data most efficiently, or to determine whether or not the grid is collectible to the desired resolution. Thus routine single particle grid and sample characterization by cryoET may not only provide information for optimizing grid preparation of a particular sample, but may also increase microscope efficiency.

## **Fiducial-less cryoET may be used to understand critical protein behavior**

During the course of this study, cryoET of single particle cryoEM grids has been valuable and even critical for understanding particle stoichiometry and anomalous behavior. For example, cryoET has been used on several HIV-1 trimer preparations with receptors to understand the stoichiometry of the bound receptors by direct visualization of individual particles in 3D (samples #5-7 and the corresponding Videos). In another example, sample #17, the size of the 'glycoprotein with bound lipids' particles varied discretely with the radial distance from the edge of holes (Figure 4 and the corresponding Video). In single particle cryoEM micrographs, this observation was not immediately explicable and would have required a single particle data collection followed by alignment and classification before reliable conclusions could be made. Instead, a single tomogram of the sample was collected and it was observed that near the edges of the hole the particles with lipids existed in two layers at the air-water interfaces. Beyond a radial distance from the edge of about 300 nm where the ice became about 15 nm thin the particles and lipids dissociated, with the particles remaining in a single layer (see Video for sample #20). A solution to this issue was found where glycosylated particles were prepared using Spotiton with conditions that intentionally created thick ice (Figure 4, sample #18). A further example highlighting the importance of using cryoET to understand the behavior of samples on grids is sample #40 (Figure 4). This sample consisted of a very low concentration of particles in solution prepared with a carbon coat over holes to increase the concentration in holes. CryoET showed that the particles were forming two layers on the carbon: a layer directly on the carbon with about 60% saturation and a layer scattered on top of the first layer with about 30% saturation. This observation made clear that particle overlap would be an issue in single particle processing and also introduced the possibility that since the particle layers were directly touching that this might induce conformational change in some of the particles. Similarly for sample #41 (Figure 4), cryoET on particles and DNA strands prepared with carbon over holes revealed that a considerable fraction of projection areas consisted of overlapping particles due to some free-floating particles attached to DNA strands, thus showing that single particle cryoEM on this sample would be highly inefficient for studying the complex of interest. In the cases described here, cryoET was an expedient and sometimes indispensable method for determining particle behavior.

## **Fiducial-less SPT can generate *de novo* initial models with no additional preparation**

A useful and sometimes critical benefit of being able to perform fiducial-less cryoET on a single particle grid is that the resulting tomograms can be processed through single particle tomography alignment and classification in order to generate *de novo* templates for single particle micrograph picking and for use as initial models in single particle alignment. In one example reported here (sample #33 and the corresponding Video), single particle micrographs of DNAB helicase-helicase loader particles were suspected to contain particles with multiple orientations, yet lower-density side views of the particles could not be reliably picked from conventionally defocused micrographs. As a result, a reliable template could not be generated

for particle picking without side views and side views could not be picked reliably without a template – a classic catch-22.

To ameliorate this problem, five tilt-series in representative areas were collected at the end of a single particle collection session, aligned in Appion-Protomo (Noble & Stagg, 2015; Winkler & Taylor, 2006), and processed through sub-tomogram alignment, classification, and multireference alignment using Dynamo (Castaño-Díez, Kudryashev, Arheit, & Stahlberg, 2012; Castaño-Díez, Kudryashev, & Stahlberg, 2017). This resulted in three *de novo* initial models, which were then used to both template pick the single particle micrographs and as initial models for single particle alignment, resulting in a 4.1 Å structure of the DNAB helicase-helicase loader (Under Review, Molecular Cell, Submitted Oct 10, 2017) (Figure 8). There are two key benefits to performing fiducial-less cryoET to generate *de novo* initial models as opposed to fiducial-based cryoET: 1) No additional gold bead + sample preparation and optimization is involved as with conventional fiducial-based tilt-series alignment and 2) The exact sample from which single particle micrographs are collected is used, thus removing the possibility of sample variation across grid preparations.

## Conclusion

We have shown that over a wide range of single particle cryoEM samples, particle and ice behaviors vary widely, yet the vast majority of particles on grids prepared using conventional techniques and using Spotiton with nanowire grids end up on air-water interfaces. This varied behavior shown in Tables 1 and 2 – varied in particle denaturation, particle preferred orientation, particle overlap in the direction of the beam, particle layer tilt, ice thickness, and ice thickness variation across holes – provides impetus for researchers to perform cryoET on their single particle cryoEM grids. Routine characterization of cryoEM grids allows for the determination of particle behavior, whether a single particle sample might produce desirable results, and optimal collection areas and strategies, thus increasing microscope and single particle processing efficiency. Moreover, cryoET on single particle cryoEM grids can be used to generate *de novo* initial models through single particle sub-tomography alignment and classification.

The observation that the vast majority of particles are on air-water interfaces warrants further research into methods for avoiding the air-water interface, such as preparing grids with non-ionic surfactants, using affinity grids, encapsulating particles in carbon layers, encapsulating particles in scaffolds, and, perhaps, faster plunging technologies to outrun air-water interface adsorption. Adding surfactants to single particle sample/grid preparation prior to freezing in order to protect bulk proteins from the air-water interfaces has been proposed and used (Frederik, Stuart, Bomans, & Busing, 1989), yet might be revisited by adding non-ionic surfactants below the CMC. Alternatively, spreading a layer of surfactant (ionic or non-ionic) onto the surface of the air-water interfaces during grid preparation might both reduce the surfactant-protein interaction in solution along with competitive adsorption, and increase the mechanical strength of the resulting surfactant layer on the air-water interface (Morris & Gunning, 2008) (perhaps using a method similar to that described in (Vos et al., 2008)). Affinity substrates, such as carbon, streptavidin, or ionic lipid monolayer over holes, may be used in an

attempt to escape the air-water interfaces, and potentially have the additional benefit of requiring lower protein concentrations in solution. However, the usage of affinity grids requires further grid optimization with regards to collecting only in areas where the ice is thick enough to more than cover the particles adsorbed to the affinity substrate, and signal is degraded due to the affinity substrate. Encapsulating two-dimensional crystals between carbon layers in order to avoid excessive dehydration due to open air-water interfaces has been performed successfully (Yang, Abe, Tani, & Fujiyoshi, 2013), opening up the possibility of encapsulating particles in-between carbon or possibly graphene layers to avoid air-water interface interactions. Particle encapsulation using protein scaffolds (Kedersha & Rome, 1986) or synthetic DNA structures (T. G. Martin et al., 2016) has also been proposed for avoiding air-water interface and preferred orientation issues. Lastly, decreasing the time between sample application and freezing in order to outrun air-water interface adsorption altogether might be possible with further technological development (Arnold et al., 2017; Feng et al., 2017; Frank, 2017; Jain et al., 2012). The time it takes for a particle to diffuse to an air-water interface, to diffuse across the air-water interface, and for subsequent bulk particles to adsorb to the resulting viscoelastic protein network film might be on the order of tens of milliseconds or greater, which appears to be largely dependent on protein surface hydrophobicity, protein concentration, and protein structure. Avoiding the air-water interface may prove critical for obtaining higher resolution structures of more fragile proteins.

# **Materials and Methods**

## **Grid preparation**

About one-third of the grids characterized were prepared using conventional techniques as determined by the sample owner. Generally, a purchased holey grid (most were Quantifoil (Quantifoil Micro Tools, GmbH, Jena, Germany) or C-flat (Protochips, Inc., Morrisville, North Carolina) carbon or gold) was glow-discharged, sample was applied at appropriate conditions, incubation on the order of 1 to 10 seconds took place, the grid was blotted (most commonly face blotted), further incubation on the order of 1 second took place, and then the grid was plunged into liquid ethane.

The remaining grids were prepared using Spotiton (Jain et al., 2012). Generally, a home-made lacey or holey carbon or gold nanowire grid (Razinkov et al., 2016) was glow-discharged, sample was sprayed onto the grid in a stripe, incubation on the order of 1 second or less took place as determined by the calibrated self-wicking time or by the maximum plunging speed of the robot, and then the grid was plunged into liquid ethane.

## **Tilt-series collection**

Tilt-series were collected at NYSBC on one of the Titan Krios microscopes (FEI Company, Hillsboro, OR) with a Gatan K2 (Gatan, Inc., Pleasanton, CA) or on the Tecnai F20 (FEI Company, Hillsboro, OR) with a DE-20 (Direct Electron, San Diego, CA) or a Tietz F416 (TVIPS GmbH, Gauting, Germany). Several tilt-series were collected using a Gatan Bioquantum energy filter (Gatan, Inc., Pleasanton, CA), and a small number were collected with a Volta phase plate (FEI Company, Hillsboro, OR). Most tilt-series were collected using Leginon (Suloway et al., 2005, 2009) on the Krios microscopes and the F20, with the remaining collected using SerialEM (Mastronarde, 2003) on the F20. Most tilt-series were collected with 100 ms frames for each tilt image and full-frame aligned using MotionCor2 (Zheng et al., 2017). Most tilt-series were collected bi-directionally with a tilt range of  $-45^\circ$  to  $45^\circ$  and a tilt increment of  $3^\circ$ . Most tilt-series were collected at a nominal defocus between 4 to 6 microns. Most tilt-series were collected with a dose rate around 8 e-/pixel/sec and an incident dose between 1.5 and 3.0 e-/Å<sup>2</sup> for the zero-degree tilt image, with increasing dose for higher tilt angles according to the cosine of the tilt angle, resulting in a total dose between 50 and 150 e-/Å<sup>2</sup>. Most tilt-series were collected at a pixel size between 1 and 2.2 Å. Hole magnification tilt-series were typically collected with a tilt range of  $-60^\circ$  to  $60^\circ$  with a tilt increment of  $1^\circ$ , a pixel size around 20 Å, and negligible dose. Each high magnification tilt-series typically collect in around 15 minutes, while hole magnification tilt-series take about 30 minutes. Most tilt-series were collected without hardware binning. Two samples were collected using super-resolution.

## **Tilt-series alignment**

Tilt-series collected with Leginon are automatically available for processing in Appion (Lander et al., 2009), while tilt-series collected with SerialEM (Mastronarde, 2003) were uploaded to

Appion prior to alignment. All tilt-series were aligned using Appion-Protomo (Noble & Stagg, 2015). Briefly, most tilt-series were first dose compensated using the relation in (Grant & Grigorieff, 2015), coarsely aligned, manually aligned if necessary, refined using a set of alignment thicknesses, then the best aligned iteration was reconstructed for visual analysis using Tomo3D SIRT (J. I. Agulleiro & Fernandez, 2011; J.-I. Agulleiro & Fernandez, 2015). CTF correction was not performed. Tilt-series typically align well in 20 - 60 minutes. Nearly all tilt-series were alignable.

# **CTF resolution limit**

Resolution limits due to errors in defocus estimation as reported in the Results and discussion were determined by plotting two CTF curves at about 1.5 microns defocus but differing by defocus error and locating the approximate resolution where the curves are out of phase by 90°.



## Data deposition and software availability

Several representative tilt-series from the datasets have been deposited to the Electron Microscopy Data Bank (EMDB) in the form of binned by 4 or 8 tomograms and to the Electron Microscopy Pilot Image Archive (EMPIAR) in the form of unaligned tilt-series images (one including super-resolution frames), Appion-Protomo tilt-series alignment runs, and aligned tilt-series stacks. Their accession codes are:

| Sample # | Sample Name                      | EMDB | EMPIAR |
|----------|----------------------------------|------|--------|
| 4        | Hemagglutinin                    | 7135 | 10129  |
| 21       | Rabbit Muscle Aldolase (1mg/mL)  | 7138 | 10130  |
| 22       | Rabbit Muscle Aldolase (6mg/mL)  | 7139 | 10131  |
| 25       | Protein in Nanodisc (0.58 mg/mL) | 7140 | --     |
| 30       | GDH                              | 7141 | 10132  |
| 31       | GDH                              | 7142 | 10133  |
| 32       | GDH (2.5 mg/mL) + 0.001% DDM     | 7143 | 10134  |
| 33       | DNAB Helicase-helicase Loader    | 7144 | 10135  |
| 34       | Apoferitin                       | 7145 | 10136  |
| 35       | Apoferitin                       | 7146 | 10137  |
| 36       | Apoferitin                       | 7147 | 10138  |
| 37       | Apoferitin (1.25 mg/mL)          | 7148 | 10139  |
| 38       | Apoferitin (0.5 mg/mL)           | 7149 | 10140  |
| 39       | Apoferitin with 0.5 mM TCEP      | 7150 | 10141  |
| 42       | T20S Proteasome                  | 7151 | 10142  |
| 43       | T20S Proteasome                  | 7152 | 10143  |
| 44       | T20S Proteasome                  | 7153 | 10144  |
| 45       | Mtb 20S Proteasome               | 7154 | 10145  |

A Docker-based version of Appion-Protomo fiducial-less tilt-series alignment is available at <http://github.com/nysbc/appion-protomo>.

# **Contributions:**

AN, Conceived and designed cryoET experiments; Collected, aligned, and analyzed cryoET data; Wrote the manuscript.

VD, Performed Spotiton experiments.

HW, Performed Spotiton experiments, Collected cryoET data.

JB, Performed neural receptor and stick-like protein experiments.

JC, Particle picked DNAB helicase-helicase loader cryoET data; Used cryoET data to further cryoEM processing.

PA, Performed HIV-1 trimer experiments.

YZT, Performed protein in nanodisc experiments.

ZZ, Performed small kinase and other protein experiments.

LK, Performed apoferritin, GDH, and rabbit aldolase experiments.

GS, Performed insulin receptor experiments.

MR, Performed stick-like protein experiments.

EE, Configured electron microscope equipment.

WR, Configured electron microscope equipment.

AC, Helped optimize Leginon tilt-series collection.

CJN, Helped integrate Appion-Protomo into Docker.

LS, Conceived and designed neural receptor and stick-like protein experiments.

PK, Conceived and designed HIV-1 trimer experiments.

DJ, Conceived and designed DNAB helicase-helicase loader experiments.

ADG, Conceived and designed DNAB helicase-helicase loader experiments.

CP, Conceived and designed experiments; Edited manuscript.

BC, Conceived and designed experiments; Edited manuscript.

# Acknowledgements

The authors wish to thank Prof. Robert Glaeser (Lawrence Berkeley National Laboratory) and Prof. Pete Wilde (Quadram Institute) for helpful discussions. The authors wish to thank Neil Voss (Roosevelt University) for the base Appion CentOS7 Docker image. The authors wish to thank several un-named sample sources. The Mtb 20S Proteasome sample was a kind gift from Huilin Li (Van Andel Research Institute).

Some of this work was performed at the Simons Electron Microscopy Center and National Resource for Automated Molecular Microscopy located at the New York Structural Biology Center, supported by grants from the Simons Foundation (349247), NYSTAR, and the NIH National Institute of General Medical Sciences (GM103310) with additional support from the Agouron Institute [Grant Number: F00316] and NIH S10 OD019994-01.

Studies on stick-like particles and neural receptors were supported in part by the National Institutes of Health (R01-MH1148175).

Science in the Jeruzalmi lab was supported by the National Institutes of Health (R01 GM084162), and the National Institute on Minority Health and Health Disparities (5G12MD007603-30).

Studies on the HIV-1 trimers were supported in part by Intramural Funding from the Vaccine Research Center, NIAID, NIH.

Studies on the protein in nanodisc were supported in part by the Agency for Science, Technology and Research Singapore.

1    **Competing interests**

2

3    The authors declare no competing financial interests.

4

# References

- Adrian, M., Dubochet, J., Lepault, J., & McDowell, A. W. (1984). Cryo-electron microscopy of viruses. *Nature*, 308(5954), 32–36. <https://doi.org/10.1038/308032a0>
- Agulleiro, J. I., & Fernandez, J. J. (2011). Fast tomographic reconstruction on multicore computers. *Bioinformatics (Oxford, England)*, 27(4), 582–583. <https://doi.org/10.1093/bioinformatics/btq692>
- Agulleiro, J.-I., & Fernandez, J.-J. (2015). Tomo3D 2.0 – Exploitation of Advanced Vector eXtensions (AVX) for 3D reconstruction. *Journal of Structural Biology*, 189(2), 147–152. <https://doi.org/10.1016/j.jsb.2014.11.009>
- Arnold, S. A., Albiez, S., Bieri, A., Syntychaki, A., Adaixo, R., McLeod, R. A., ... Braun, T. (2017). Blotting-free and lossless cryo-electron microscopy grid preparation from nanoliter-sized protein samples and single-cell extracts. *Journal of Structural Biology*, 197(3), 220–226. <https://doi.org/10.1016/j.jsb.2016.11.002>
- Billsten, P., Wahlgren, M., Arnebrant, T., McGuire, J., & Elwing, H. (1995). Structural Changes of T4 Lysozyme upon Adsorption to Silica Nanoparticles Measured by Circular Dichroism. *Journal of Colloid and Interface Science*, 175(1), 77–82. <https://doi.org/10.1006/jcis.1995.1431>
- Birdi, K. S. (1972). The determination of work of compression of protein monolayers at the air-water interface. *Kolloid-Zeitschrift Und Zeitschrift Für Polymere*, 250(3), 222–226. <https://doi.org/10.1007/BF01507606>
- Castañó-Díez, D., Kudryashev, M., Arheit, M., & Stahlberg, H. (2012). Dynamo: A flexible, user-friendly development tool for subtomogram averaging of cryo-EM data in high-performance computing environments. *Journal of Structural Biology*, 178(2), 139–151. <https://doi.org/10.1016/j.jsb.2011.12.017>

1 Castaño-Díez, D., Kudryashev, M., & Stahlberg, H. (2017). Dynamo Catalogue: Geometrical  
2 tools and data management for particle picking in subtomogram averaging of cryo-  
3 electron tomograms. *Journal of Structural Biology*, 197(2), 135–144.  
4 <https://doi.org/10.1016/j.jsb.2016.06.005>

5 Damodaran, S., & Song, K. B. (1988). Kinetics of adsorption of proteins at interfaces: role of  
6 protein conformation in diffusional adsorption. *Biochimica et Biophysica Acta (BBA) -*  
7 *Protein Structure and Molecular Enzymology*, 954(Supplement C), 253–264.  
8 [https://doi.org/10.1016/0167-4838\(88\)90080-5](https://doi.org/10.1016/0167-4838(88)90080-5)

9 de Jongh, H. H. J., Kusters, H. A., Kudryashova, E., Meinders, M. B. J., Trofimova, D., &  
10 Wierenga, P. A. (2004). Protein adsorption at air–water interfaces: A combination of  
11 details. *Biopolymers*, 74(1–2), 131–135. <https://doi.org/10.1002/bip.20036>

12 Dickinson, E., Murray, B. S., & Stainsby, G. (1988). Protein adsorption at air-water and oil-water  
13 interfaces. *Advances in Food Emulsions and Foams, Edited by Eric Dickinson and*  
14 *George Stainsby*. Retrieved from [http://agris.fao.org/agris-](http://agris.fao.org/agris-search/search.do?recordID=US201302679928)  
15 [search/search.do?recordID=US201302679928](http://agris.fao.org/agris-search/search.do?recordID=US201302679928)

16 Dubochet, J., Adrian, M., Chang, J.-J., Homo, J.-C., Lepault, J., McDowell, A. W., & Schultz, P.  
17 (1988). Cryo-electron microscopy of vitrified specimens. *Quarterly Reviews of*  
18 *Biophysics*, 21(2), 129–228. <https://doi.org/10.1017/S0033583500004297>

19 Dubochet, J., Adrian, M., Lepault, J., & McDowell, A. W. (1985). Emerging techniques: Cryo-  
20 electron microscopy of vitrified biological specimens. *Trends in Biochemical Sciences*,  
21 10(4), 143–146. [https://doi.org/10.1016/0968-0004\(85\)90150-1](https://doi.org/10.1016/0968-0004(85)90150-1)

22 Dubochet, J., Lepault, J., Freeman, R., Berriman, J. A., & Homo, J.-C. (1982). Electron  
23 microscopy of frozen water and aqueous solutions. *Journal of Microscopy*, 128(3), 219–  
24 237. <https://doi.org/10.1111/j.1365-2818.1982.tb04625.x>



Feng, X., Fu, Z., Kaledhonkar, S., Jia, Y., Shah, B., Jin, A., ... Lin, Q. (2017). A Fast and Effective Microfluidic Spraying-Plunging Method for High-Resolution Single-Particle Cryo-EM. *Structure*, 25(4), 663–670.e3. <https://doi.org/10.1016/j.str.2017.02.005>

Frank, J. (2017). Time-resolved cryo-electron microscopy: Recent progress. *Journal of Structural Biology*. <https://doi.org/10.1016/j.jsb.2017.06.005>

Frederik, P. M., Stuart, M. C. A., Bomans, P. H. H., & Busing, W. M. (1989). Phospholipid, Nature's own slide and cover slip for cryo-electron microscopy. *Journal of Microscopy*, 153(1), 81–92. <https://doi.org/10.1111/j.1365-2818.1989.tb01469.x>

Ganzevles, R. A., Fokkink, R., van Vliet, T., Cohen Stuart, M. A., & de Jongh, H. H. J. (2008). Structure of mixed  $\beta$ -lactoglobulin/pectin adsorbed layers at air/water interfaces; a spectroscopy study. *Journal of Colloid and Interface Science*, 317(1), 137–147. <https://doi.org/10.1016/j.jcis.2007.09.030>

Glaeser, R. M., & Han, B.-G. (2017). Opinion: hazards faced by macromolecules when confined to thin aqueous films. *Biophysics Reports*, 3(1–3), 1–7. <https://doi.org/10.1007/s41048-016-0026-3>

Glaeser, R. M., Han, B.-G., Csencsits, R., Killilea, A., Pulk, A., & Cate, J. H. D. (2016). Factors that Influence the Formation and Stability of Thin, Cryo-EM Specimens. *Biophysical Journal*, 110(4), 749–755. <https://doi.org/10.1016/j.bpj.2015.07.050>

Graham, D. E., & Phillips, M. C. (1979). Proteins at liquid interfaces: I. Kinetics of adsorption and surface denaturation. *Journal of Colloid and Interface Science*, 70(3), 403–414. [https://doi.org/10.1016/0021-9797\(79\)90048-1](https://doi.org/10.1016/0021-9797(79)90048-1)

Grant, T., & Grigorieff, N. (2015). Measuring the optimal exposure for single particle cryo-EM using a 2.6 Å reconstruction of rotavirus VP6. *ELife*, 4, e06980. <https://doi.org/10.7554/eLife.06980>

Gunning, A. P., & Morris, V. J. (2017). Getting the feel of food structure with atomic force microscopy. *Food Hydrocolloids*. <https://doi.org/10.1016/j.foodhyd.2017.05.017>

- 1 Gunning, A. P., Wilde, P. J., Clark, D. C., Morris, V. J., Parker, M. L., & Gunning, P. A. (1996).  
2 Atomic Force Microscopy of Interfacial Protein Films. *Journal of Colloid and Interface*  
3 *Science*, 183(2), 600–602. <https://doi.org/10.1006/jcis.1996.0584>
- 4 Gunning, P. A., Mackie, A. R., Gunning, A. P., Woodward, N. C., Wilde, P. J., & Morris, V. J.  
5 (2004). Effect of Surfactant Type on Surfactant–Protein Interactions at the Air–Water  
6 Interface. *Biomacromolecules*, 5(3), 984–991. <https://doi.org/10.1021/bm0344957>
- 7 Jaffe, J. S., & Glaeser, R. M. (1984). Preparation of frozen-hydrated specimens for high  
8 resolution electron microscopy. *Ultramicroscopy*, 13(4), 373–377.  
9 [https://doi.org/10.1016/0304-3991\(84\)90003-2](https://doi.org/10.1016/0304-3991(84)90003-2)
- 10 Jain, T., Sheehan, P., Crum, J., Carragher, B., & Potter, C. S. (2012). Spotiton: A prototype for  
11 an integrated inkjet dispense and vitrification system for cryo-TEM. *Journal of Structural*  
12 *Biology*, 179(1), 68–75. <https://doi.org/10.1016/j.jsb.2012.04.020>
- 13 Kedersha, N. L., & Rome, L. H. (1986). Isolation and characterization of a novel  
14 ribonucleoprotein particle: large structures contain a single species of small RNA. *The*  
15 *Journal of Cell Biology*, 103(3), 699–709. <https://doi.org/10.1083/jcb.103.3.699>
- 16 Kremer, J. R., Mastronarde, D. N., & McIntosh, J. R. (1996). Computer Visualization of Three-  
17 Dimensional Image Data Using IMOD. *Journal of Structural Biology*, 116(1), 71–76.  
18 <https://doi.org/10.1006/jsbi.1996.0013>
- 19 Kudryashova, E. V., Visser, A. J. W. G., & De Jongh, H. H. J. (2005). Reversible self-  
20 association of ovalbumin at air–water interfaces and the consequences for the exerted  
21 surface pressure. *Protein Science*, 14(2), 483–493. <https://doi.org/10.1110/ps.04771605>
- 22 Lad, M. D., Birembaut, F., Matthew, J. M., Frazier, R. A., & Green, R. J. (2006). The adsorbed  
23 conformation of globular proteins at the air/water interface. *Physical Chemistry Chemical*  
24 *Physics*, 8(18), 2179–2186. <https://doi.org/10.1039/B515934B>
- 25 Lander, G. C., Stagg, S. M., Voss, N. R., Cheng, A., Fellmann, D., Pulokas, J., ... Carragher, B.  
26 (2009). Appion: An integrated, database-driven pipeline to facilitate EM image

processing. *Journal of Structural Biology*, 166(1), 95–102.  
<https://doi.org/10.1016/j.jsb.2009.01.002>

Langmuir, I. (1917). THE CONSTITUTION AND FUNDAMENTAL PROPERTIES OF SOLIDS AND LIQUIDS. II. LIQUIDS.1. *Journal of the American Chemical Society*, 39(9), 1848–1906. <https://doi.org/10.1021/ja02254a006>

Le Floch-Fouéré, C., Beaufils, S., Lechevalier, V., Nau, F., Pézolet, M., Renault, A., & Pezenec, S. (2010). Sequential adsorption of egg-white proteins at the air–water interface suggests a stratified organization of the interfacial film. *Food Hydrocolloids*, 24(4), 275–284. <https://doi.org/10.1016/j.foodhyd.2009.10.006>

Mackie, A. R., Gunning, A. P., Wilde, P. J., & Morris, V. J. (1999). Orogenic Displacement of Protein from the Air/Water Interface by Competitive Adsorption. *Journal of Colloid and Interface Science*, 210(1), 157–166. <https://doi.org/10.1006/jcis.1998.5941>

MacRitchie, F. (1998). Reversibility of protein adsorption. In D. Möbius & R. Miller (Eds.), *Studies in Interface Science* (Vol. 7, pp. 149–177). Elsevier.  
[https://doi.org/10.1016/S1383-7303\(98\)80051-3](https://doi.org/10.1016/S1383-7303(98)80051-3)

Martin, A. H., Cohen Stuart, M. A., Bos, M. A., & van Vliet, T. (2005). Correlation between Mechanical Behavior of Protein Films at the Air/Water Interface and Intrinsic Stability of Protein Molecules. *Langmuir*, 21(9), 4083–4089. <https://doi.org/10.1021/la047417t>

Martin, A. H., Meinders, M. B. J., Bos, M. A., Cohen Stuart, M. A., & van Vliet, T. (2003). Conformational Aspects of Proteins at the Air/Water Interface Studied by Infrared Reflection–Absorption Spectroscopy. *Langmuir*, 19(7), 2922–2928.  
<https://doi.org/10.1021/la0208629>

Martin, T. G., Bharat, T. A. M., Joerger, A. C., Bai, X., Praetorius, F., Fersht, A. R., ... Scheres, S. H. W. (2016). Design of a molecular support for cryo-EM structure determination. *Proceedings of the National Academy of Sciences*, 113(47), E7456–E7463.  
<https://doi.org/10.1073/pnas.1612720113>

1 Mastronarde, D. N. (2003). SerialEM: A program for automated tilt series acquisition on Tecnai  
2 microscopes using prediction of specimen position. *Microscopy and Microanalysis*, 9,  
3 1182CD.

4 Meinders, M. B., Bosch, G. G. van den, & Jongh, H. H. de. (2001). Adsorption properties of  
5 proteins at and near the air/water interface from IRRAS spectra of protein solutions.  
6 *European Biophysics Journal*, 30(4), 256–267. <https://doi.org/10.1007/s002490000124>

7 Morris, V. J., & Gunning, A. P. (2008). Microscopy, microstructure and displacement of proteins  
8 from interfaces: implications for food quality and digestion. *Soft Matter*, 4(5), 943–951.  
9 <https://doi.org/10.1039/B718904D>

10 Naydenova, K., & Russo, C. J. (2017). Measuring the effects of particle orientation to improve  
11 the efficiency of electron cryomicroscopy. *Nature Communications*, 8(1).  
12 <https://doi.org/10.1038/s41467-017-00782-3>

13 Noble, A. J., & Stagg, S. M. (2015). Automated batch fiducial-less tilt-series alignment in Appion  
14 using Protomo. *Journal of Structural Biology*, 192(2), 270–278.  
15 <https://doi.org/10.1016/j.jsb.2015.10.003>

16 Pettersen, E. F., Goddard, T. D., Huang, C. C., Couch, G. S., Greenblatt, D. M., Meng, E. C., &  
17 Ferrin, T. E. (2004). UCSF Chimera--a visualization system for exploratory research and  
18 analysis. *Journal of Computational Chemistry*, 25(13), 1605–1612.  
19 <https://doi.org/10.1002/jcc.20084>

20 Punjani, A., Rubinstein, J. L., Fleet, D. J., & Brubaker, M. A. (2017). cryoSPARC: algorithms for  
21 rapid unsupervised cryo-EM structure determination. *Nature Methods*, 14(3), 290–296.  
22 <https://doi.org/10.1038/nmeth.4169>

23 Rabe, M., Verdes, D., & Seeger, S. (2011). Understanding protein adsorption phenomena at  
24 solid surfaces. *Advances in Colloid and Interface Science*, 162(1), 87–106.  
25 <https://doi.org/10.1016/j.cis.2010.12.007>

Razinkov, I., Dandey, V. P., Wei, H., Zhang, Z., Melnekoff, D., Rice, W. J., ... Carragher, B. (2016). A new method for vitrifying samples for cryoEM. *Journal of Structural Biology*, 195(2), 190–198. <https://doi.org/10.1016/j.jsb.2016.06.001>

Reddy, G. L., & Nagara, R. (1989). Circular dichroism studies on synthetic signal peptides indicate beta-conformation as a common structural feature in highly hydrophobic environment. *Journal of Biological Chemistry*, 264(28), 16591–16597.

Renault, A., Pezenec, S., Gauthier, F., Vié, V., & Desbat, B. (2002). Surface Rheological Properties of Native and S-Ovalbumin Are Correlated with the Development of an Intermolecular  $\beta$ -Sheet Network at the Air–Water Interface. *Langmuir*, 18(18), 6887–6895. <https://doi.org/10.1021/la0257586>

Scheres, S. H. W. (2012). RELION: Implementation of a Bayesian approach to cryo-EM structure determination. *Journal of Structural Biology*, 180(3), 519–530. <https://doi.org/10.1016/j.jsb.2012.09.006>

Scheres, S. H. W., Gao, H., Valle, M., Herman, G. T., Eggermont, P. P. B., Frank, J., & Carazo, J.-M. (2006). Disentangling conformational states of macromolecules in 3D-EM through likelihood optimization. *Nature Methods*, 4(1), nmeth992. <https://doi.org/10.1038/nmeth992>

Scheres, S. H. W., Núñez-Ramírez, R., Sorzano, C. O. S., Carazo, J. M., & Marabini, R. (2008). Image processing for electron microscopy single-particle analysis using XMIPP. *Nature Protocols*, 3(6), 977–990. <https://doi.org/10.1038/nprot.2008.62>

Stanimirova, R. D., Marinova, K. G., Danov, K. D., Kralchevsky, P. A., Basheva, E. S., Stoyanov, S. D., & Pelan, E. G. (2014). Competitive adsorption of the protein hydrophobin and an ionic surfactant: Parallel vs sequential adsorption and dilatational rheology. *Colloids and Surfaces A: Physicochemical and Engineering Aspects*, 457(Supplement C), 307–317. <https://doi.org/10.1016/j.colsurfa.2014.06.002>

Suloway, C., Pulokas, J., Fellmann, D., Cheng, A., Guerra, F., Quispe, J., ... Carragher, B. (2005). Automated molecular microscopy: The new Leginon system. *Journal of Structural Biology*, 151(1), 41–60. <https://doi.org/10.1016/j.jsb.2005.03.010>

Suloway, C., Shi, J., Cheng, A., Pulokas, J., Carragher, B., Potter, C. S., ... Jensen, G. J. (2009). Fully automated, sequential tilt-series acquisition with Leginon. *Journal of Structural Biology*, 167(1), 11–18. <https://doi.org/10.1016/j.jsb.2009.03.019>

Tan, Y. Z., Baldwin, P. R., Davis, J. H., Williamson, J. R., Potter, C. S., Carragher, B., & Lyumkis, D. (2017). Addressing preferred specimen orientation in single-particle cryo-EM through tilting. *Nature Methods*, 14(8), 793–796. <https://doi.org/10.1038/nmeth.4347>

Taylor, K. A., & Glaeser, R. M. (1974). Electron Diffraction of Frozen, Hydrated Protein Crystals. *Science*, 186(4168), 1036–1037. <https://doi.org/10.1126/science.186.4168.1036>

Taylor, K. A., & Glaeser, R. M. (1976). Electron microscopy of frozen hydrated biological specimens. *Journal of Ultrastructure Research*, 55(3), 448–456. [https://doi.org/10.1016/S0022-5320\(76\)80099-8](https://doi.org/10.1016/S0022-5320(76)80099-8)

Taylor, K. A., & Glaeser, R. M. (2008). Retrospective on the early development of cryoelectron microscopy of macromolecules and a prospective on opportunities for the future. *Journal of Structural Biology*, 163(3), 214–223. <https://doi.org/10.1016/j.jsb.2008.06.004>

Tie, Y., Calonder, C., & Van Tassel, P. R. (2003). Protein adsorption: Kinetics and history dependence. *Journal of Colloid and Interface Science*, 268(1), 1–11. [https://doi.org/10.1016/S0021-9797\(03\)00516-2](https://doi.org/10.1016/S0021-9797(03)00516-2)

Turnit, H. J. (1960). A theory and method for the spreading of protein monolayers. *Journal of Colloid Science*, 15(1), 1–13. [https://doi.org/10.1016/0095-8522\(60\)90002-7](https://doi.org/10.1016/0095-8522(60)90002-7)

Vance, S. J., McDonald, R. E., Cooper, A., Smith, B. O., & Kennedy, M. W. (2013). The structure of latherin, a surfactant allergen protein from horse sweat and saliva. *Journal of The Royal Society Interface*, 10(85), 20130453. <https://doi.org/10.1098/rsif.2013.0453>



Vliet, T. van, Martin, A., Renkema, M., Bos, M., Valle, G. D., & Popineau, Y. (2002). Gel formation by sy glycinin in bulk and at interfaces. In *Plant Biopolymer Science* (pp. 241–252). <https://doi.org/10.1039/9781847551672-00241>

Vos, M. R., Bomans, P. H. H., Frederik, P. M., & Sommerdijk, N. A. J. M. (2008). The development of a glove-box/Vitrobot combination: Air–water interface events visualized by cryo-TEM. *Ultramicroscopy*, 108(11), 1478–1483. <https://doi.org/10.1016/j.ultramic.2008.03.014>

Wilde, P., Mackie, A., Husband, F., Gunning, P., & Morris, V. (2004). Proteins and emulsifiers at liquid interfaces. *Advances in Colloid and Interface Science*, 108(Supplement C), 63–71. <https://doi.org/10.1016/j.cis.2003.10.011>

Winkler, H., & Taylor, K. A. (2006). Accurate marker-free alignment with simultaneous geometry determination and reconstruction of tilt series in electron tomography. *Ultramicroscopy*, 106(3), 240–254. <https://doi.org/10.1016/j.ultramic.2005.07.007>

Yang, F., Abe, K., Tani, K., & Fujiyoshi, Y. (2013). Carbon sandwich preparation preserves quality of two-dimensional crystals for cryo-electron microscopy. *Microscopy*, 62(6), 597–606. <https://doi.org/10.1093/jmicro/dft038>

Yano, Y. F. (2012). Kinetics of protein unfolding at interfaces. *Journal of Physics: Condensed Matter*, 24(50), 503101. <https://doi.org/10.1088/0953-8984/24/50/503101>

Yano, Y. F., Uruga, T., Tanida, H., Toyokawa, H., Terada, Y., Takagaki, M., & Yamada, H. (2009). Driving Force Behind Adsorption-Induced Protein Unfolding: A Time-Resolved X-ray Reflectivity Study on Lysozyme Adsorbed at an Air/Water Interface. *Langmuir*, 25(1), 32–35. <https://doi.org/10.1021/la803235x>

Yin, X., Liu, M., Tian, Y., Wang, J., & Xu, Y. (2017). Cryo-EM structure of human DNA-PK holoenzyme. *Cell Research*, 27(11), cr2017110. <https://doi.org/10.1038/cr.2017.110>

- 1 Zangi, R., de Vocht, M. L., Robillard, G. T., & Mark, A. E. (2002). Molecular Dynamics Study of
- 2 the Folding of Hydrophobin SC3 at a Hydrophilic/Hydrophobic Interface. *Biophysical*
- 3 *Journal*, 83(1), 112–124. [https://doi.org/10.1016/S0006-3495\(02\)75153-9](https://doi.org/10.1016/S0006-3495(02)75153-9)
- 4 Zhang, S., Holmes, T., Lockshin, C., & Rich, A. (1993). Spontaneous assembly of a self-
- 5 complementary oligopeptide to form a stable macroscopic membrane. *Proceedings of*
- 6 *the National Academy of Sciences*, 90(8), 3334–3338.
- 7 <https://doi.org/10.1073/pnas.90.8.3334>
- 8 Zheng, S. Q., Palovcak, E., Armache, J.-P., Verba, K. A., Cheng, Y., & Agard, D. A. (2017).
- 9 MotionCor2: anisotropic correction of beam-induced motion for improved cryo-electron
- 10 microscopy. *Nature Methods*, 14(4), 331–332. <https://doi.org/10.1038/nmeth.4193>

## Figures

### A: Grid hole with ideal single particle and ice behavior

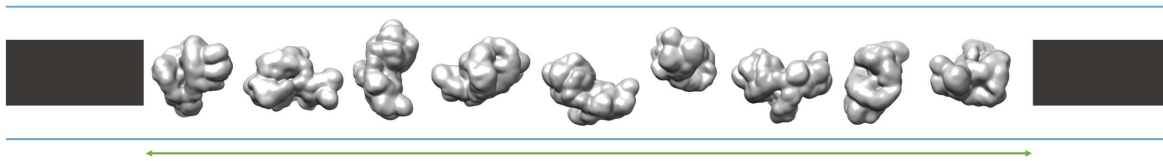

### B: Grid holes with areas of ideal single particle and ice behavior

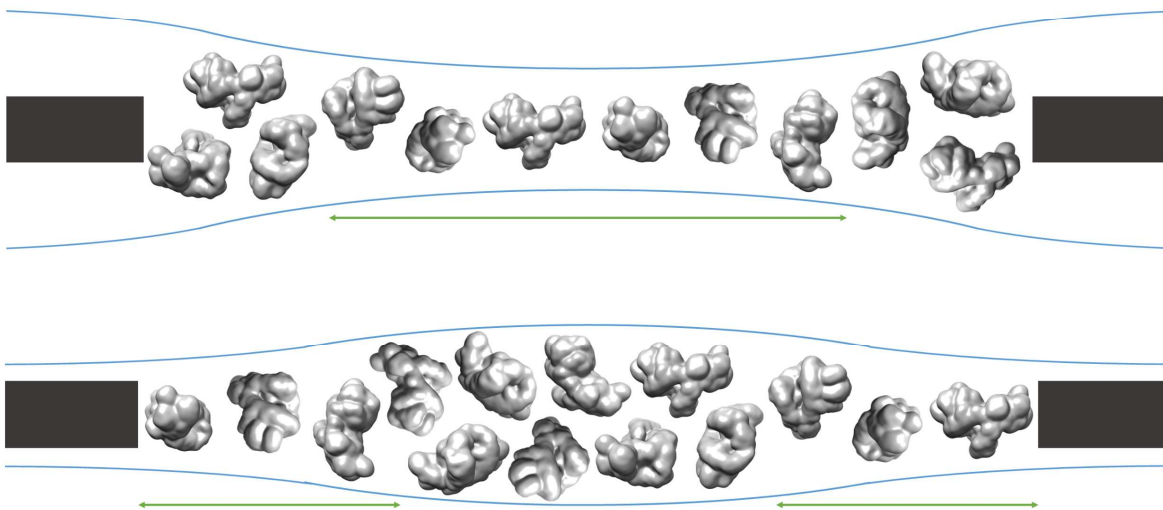

**Figure 1.** Schematic diagrams of grid hole cross-sections containing regions of ideal particle and ice behavior for single particle cryoEM collection. A) A grid hole where all regions of particles and ice exhibit ideal behavior. B) Grid holes where there are areas that exhibit ideal particle and ice behavior. Green arrows indicate areas with ideal particle and ice behavior. The generic particle shown is a lowpass filtered holoenzyme, EMD-6803 (Yin, Liu, Tian, Wang, & Xu, 2017). The particles were rendered with UCSF Chimera (Pettersen et al., 2004).

## A: Potential air-water interface composition

- 1) Clean
- 2) Primary, secondary, tertiary protein structures/networks from denaturation
- 3) Surfactants (if present)

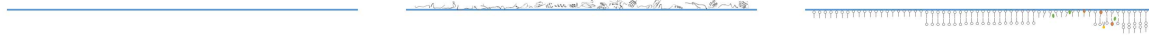

## B: Potential bulk particle behavior at/near an air-water interface\*

- 1) Free-floating particles (no preferred orientation)
- 2) Particles at air-water interface (no preferred orientation)
- 3) Particles at air-water interface, no denaturation (N-preferred orientations)

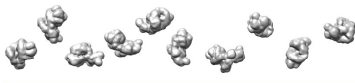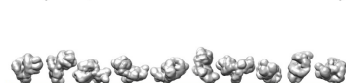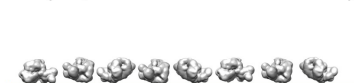

- 4) Particles at air-water interface, partial denaturation (M-preferred orientations)

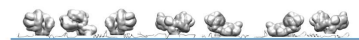

- 5) Particles at air-water interface, significant denaturation

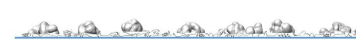

\* Particles might also aggregate.

## C: Potential ice thickness variations in holes†

- 1) Convex

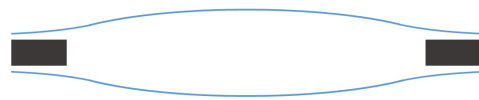

- 2) Flat

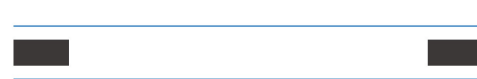

- 3) Concave (center is thicker than particle's minor axis)

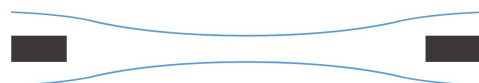

- 4) Concave (center is thinner than particle's minor axis)

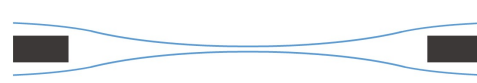

† Apposed ice curvatures are not necessarily equivalent.

**Figure 2.** Depictions of potential ice and particle behavior in cryoEM grid holes, based on Figure 5 from (Taylor & Glaeser, 2008). A region of a hole may be described by a combination of one option from A) for each air-water interface and one or more options from B). An entire hole may be described by a set of regions and one or more options from C). A) Each air-water interface might be described by either 1), 2), or 3). Note that cryoET might only be able to resolve tertiary and secondary protein structures/network elements at the air-water interface. B) Particle behavior between air-water interfaces and at each interface might be composed of any combination of 1) through 5), with or without aggregation. At high enough concentrations additional preferred orientations might become available in B3 and B4 due to neighboring protein-protein interactions. C) Ice thickness variations through a central cross-section of hole may be described by one option for one air-water interface and one option for the apposed

1 interface. Note that in C1 the particle's minor axis may be larger than the ice thickness. In both  
2 C1 and C4 the particle may still reside in areas thinner than its minor axis if the particle is  
3 compressible.  
4



| Sample #<br>Name             | Example cross-sectional<br>schematic diagram                                      | Sample #<br>Name                                  | Example cross-sectional<br>schematic diagram                                      | Sample #<br>Name                     | Example cross-sectional<br>schematic diagram                                       | Sample #<br>Name                                     | Example cross-sectional<br>schematic diagram                                        |
|------------------------------|-----------------------------------------------------------------------------------|---------------------------------------------------|-----------------------------------------------------------------------------------|--------------------------------------|------------------------------------------------------------------------------------|------------------------------------------------------|-------------------------------------------------------------------------------------|
| 1*<br>32 kDa Kinase          |  | 14*<br>Neural Receptor                            |  | 27*<br>IDE                           |  | 38*†<br>Apoferritin (0.5 mg/mL)                      |  |
| 4*†<br>Hemagglutinin         |  | 17*<br>Protein with Bound Lipids (deglycosylated) |  | 30*†<br>GDH                          |  | 39*†<br>Apoferritin with 0.5 mM TCEP                 |  |
| 5*<br>HIV-1 Trimer Complex 1 |  | 18<br>Protein with Bound Lipids (glycosylated)    |  | 31*†<br>GDH                          |  | 40<br>Protein with Carbon Over Holes                 |  |
| 6*<br>HIV-1 Trimer Complex 1 |  | 19*<br>Lipo-protein                               |  | 32*†<br>GDH + 0.001% DDM (2.5 mg/mL) |  | 41<br>Protein and DNA Strands with Carbon Over Holes |  |
| 7*<br>HIV-1 Trimer Complex 2 |  | 20<br>GPCR                                        |  | 33*†<br>DNAB Helicase-loader         |  | 42*†<br>T20S Proteasome                              |  |
| 10*<br>Stick-like Protein 1  |  | 21*†<br>Rabbit Muscle Aldolase (1mg/mL)           |  | 34*†<br>Apoferritin                  |  | 43*†<br>T20S Proteasome                              |  |
| 12*<br>Stick-like Protein 2  |  | 22*†<br>Rabbit Muscle Aldolase (6mg/mL)           |  | 35*†<br>Apoferritin                  |  | 44*†<br>T20S Proteasome                              |  |
| 13*<br>Neural Receptor       |  | 25*<br>Protein in Nanodisc (0.58 mg/mL)           |  | 36*†<br>Apoferritin                  |  | 45*†<br>Mtb Proteasome                               |  |
|                              |                                                                                   |                                                   |                                                                                   | 37*†<br>Apoferritin (1.25 mg/mL)     |  | 46<br>Protein on Streptavidin                        |  |

**Figure 4.** A selection of cross-sectional schematic diagrams of particle and ice behaviors in holes as, depicted in according to analysis of individual tomograms. The relative thicknesses of the ice in the cross-sections are depicted accurately. Each diagram is tilted corresponding to the tomogram from which it is derived; ie. the depicted tilts represent the orientation of the objects in the field of view at zero-degree nominal stage tilt. The cross-sectional characteristics depicted here are not necessarily representative of the aggregate. An asterisk (\*) indicates that a Video of the schematic diagram alongside the corresponding tomogram slice-through video is included for the sample. A dagger (†) indicates that a dataset is deposited for sample. A generic particle, holoenzyme EMD-6803 (Yin et al., 2017), is used in place of some confidential samples (samples #40, 41, and 46).



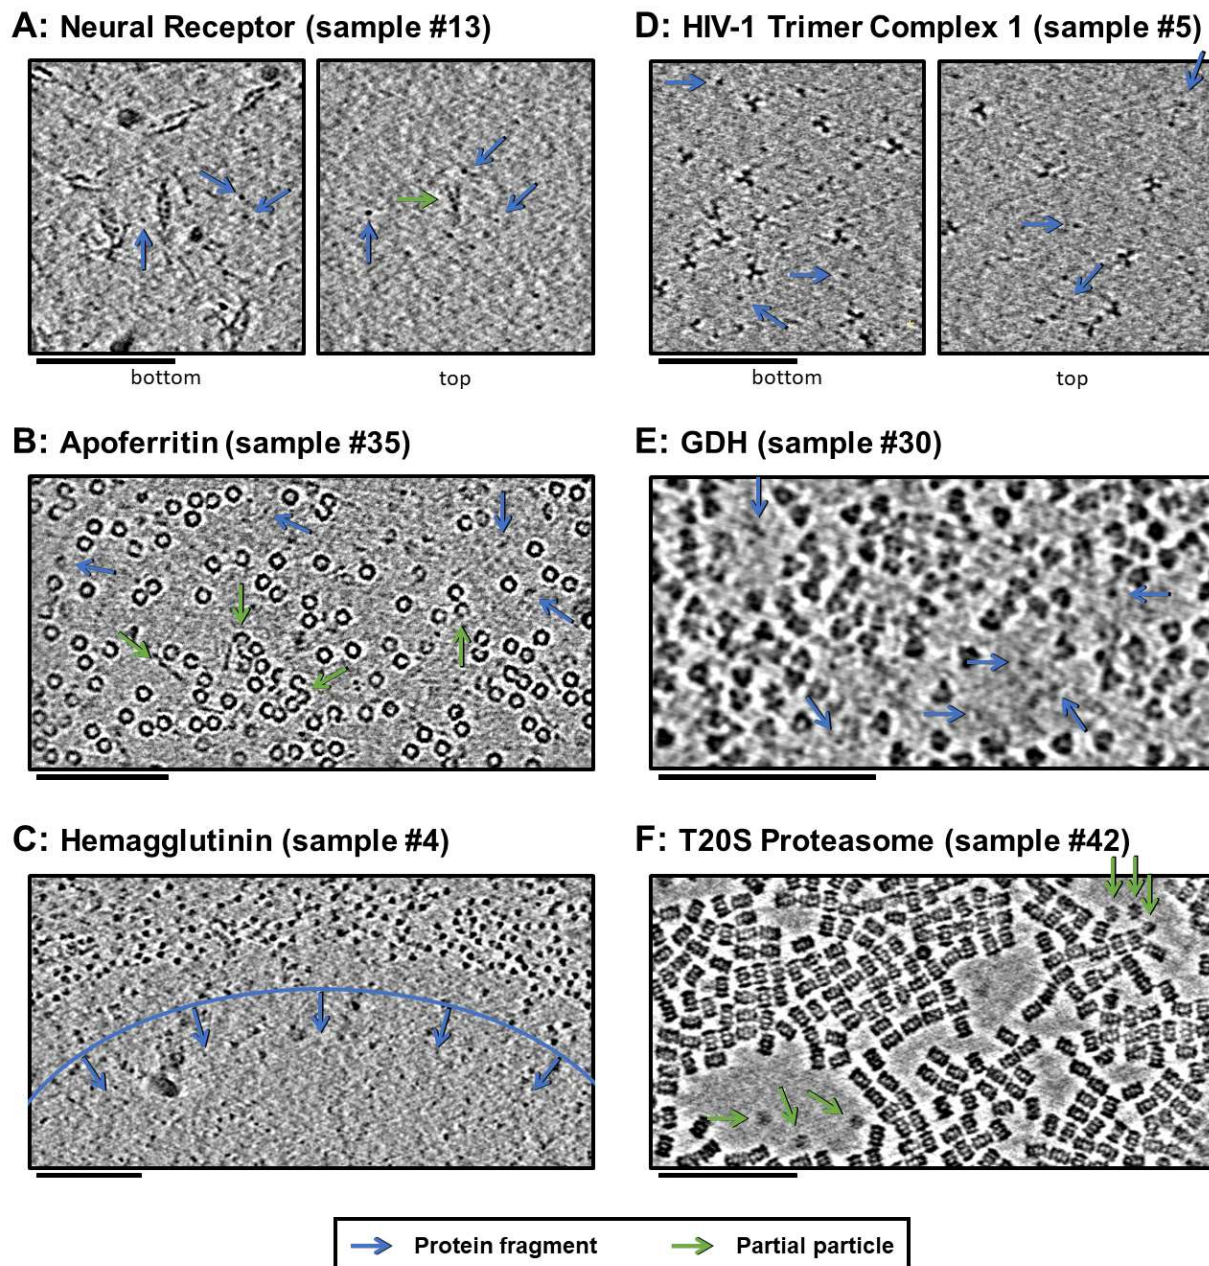

**Figure 5.** Slices of tomograms, about 10 nm thick, at air-water interfaces of samples that show clear protein fragments (examples indicated with blue arrows) and/or partial particles (examples indicated with green arrows), presented roughly in order of decreasing overall fragmentation. A) Neural receptor shows a combination of fragmented 13 kDa domains consisting primarily of  $\beta$ -sheets and partial particles. B) Apoferritin shows apparent fragmented strands and domains along with partial particles. C) Hemagglutinin shows a clear dividing line, marked with blue, where the ice became too thin to support full particles, but thick enough to support protein fragments. This is an example of both air-water interfaces characterized by C4 in Figure 2. D) HIV-1 trimer complex 1 shows several protein fragments on the order of 10 kDa, however these might be receptors intentionally introduced to solution before plunge-freezing. E) GDH shows

protein fragments interspersed between particles. F) T20S proteasome shows partial particles on an otherwise clean air-water interface (see the end of the Video for sample #42). For the examples shown here it is not clear whether the protein fragments and partial particles observed are due to unclean preparation conditions, protein degradation in solution, or unfolding at the air-water interfaces, or a combination; all cases are expected to result in the same observables due to competitive and sequential adsorption. Scale bars are 100 nm.

## A: Limits imposed by ice thickness variations

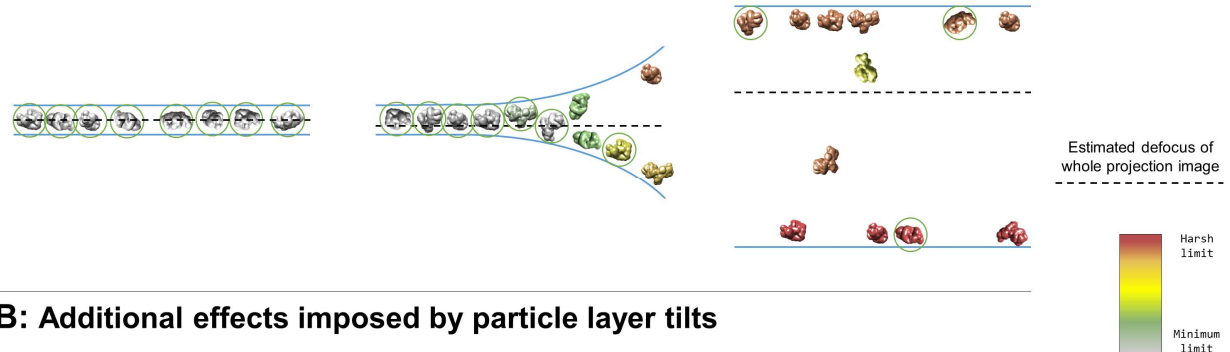

## B: Additional effects imposed by particle layer tilts

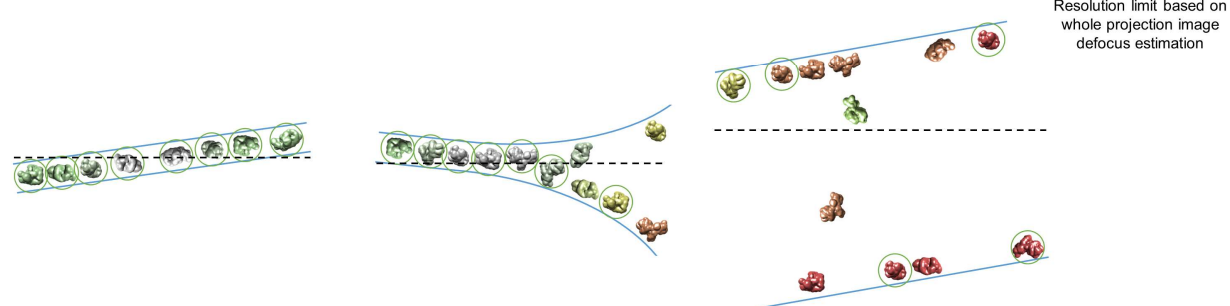

**Figure 6.** Collection and processing limits imposed by variations in ice thickness (A) and particle layer tilt (B), given that the vast majority of particles in holes on conventionally-prepared cryoEM grids are adsorbed to an air-water interface. A) Variations in ice thickness within and between holes might limit the number of non-overlapping particles in projection images (efficiency of collection and processing), the accuracy of whole image and local defocus estimation (accuracy in processing), the signal-to-noise ratio in areas of thicker ice (efficiency of collection and processing), and the reliability of particle alignment due to overlapping particles being treated as a single particle. B) Variations in the tilt angle of a given particle layer might affect the accuracy of defocus estimation if the field of view is not considered to be tilted, yet will increase the observed orientations of the particle in the dataset if the particle exhibits preferred orientations. Dashed black lines indicate the height of defocus estimation on the projected cross-section if sample tilt is not taken into account during defocus estimation. Particles are colored relative to their distance from the whole image defocus estimation to indicate the effects of ice thickness and particle layer tilt. Gray particles would be minimally impacted by whole-image CTF correction while red particles would be harshly impacted by whole-image CTF correction. Particles that would be uniquely identifiable in the corresponding projection image are circled in green.

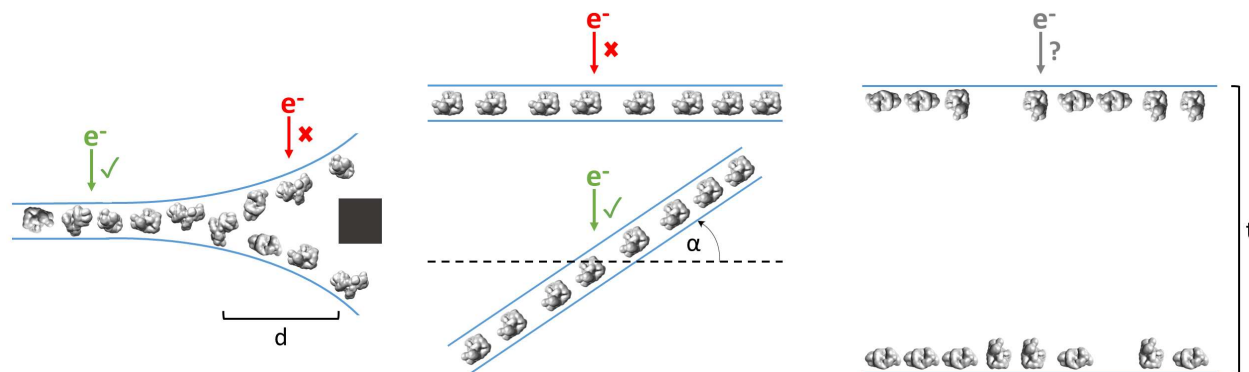

**Figure 7.** Examples of typical single particle and ice behavior as might be revealed by fiducial-less cryoET and how such characterization might influence strategies for single particle collection. Left: For a sample that exhibits thick ice near the edges of holes and ice in the center of holes that is thin enough for a single layer of particles to reside, single particle micrographs would optimally be collected a distance,  $d$ , away from the edges of holes. Middle: A sample that exhibits a high degree of preferred orientation may require tilted single particle collection by intentionally tilting the stage by a set of angles,  $\alpha$ , in order to recover a more anisotropic set of particle projections (Tan et al., 2017). Right: For a sample that consists of multiple layers of particles across holes, the sample owner may decide to proceed with collection with the knowledge that the efficiency will be limited by the particle saturation in each layer and that the resolution will be limited by the decrease in signal due to the ice thickness,  $t$ , and the accuracy of CTF estimation and correction. The results of cryoET on a given single particle cryoEM grid might also result in the sample owner deciding that the entire grid is not worth collecting on, potentially due to the situations described here or due to observed particle degradation.



# A: Gaussian particle picking

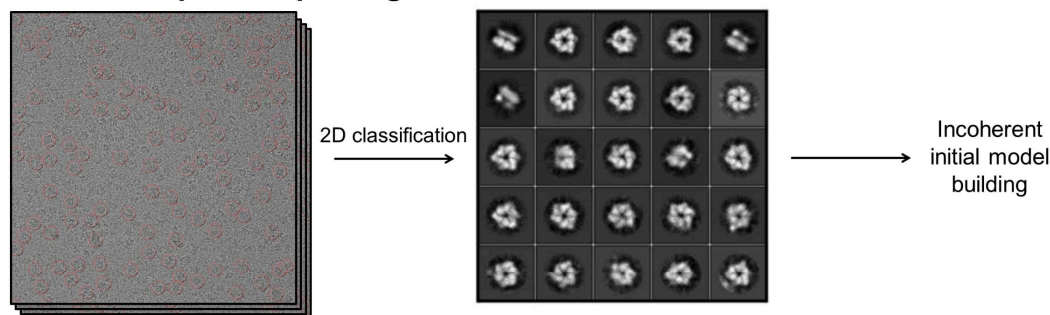

# B: CryoET SPT produces *de novo* templates for picking and alignment

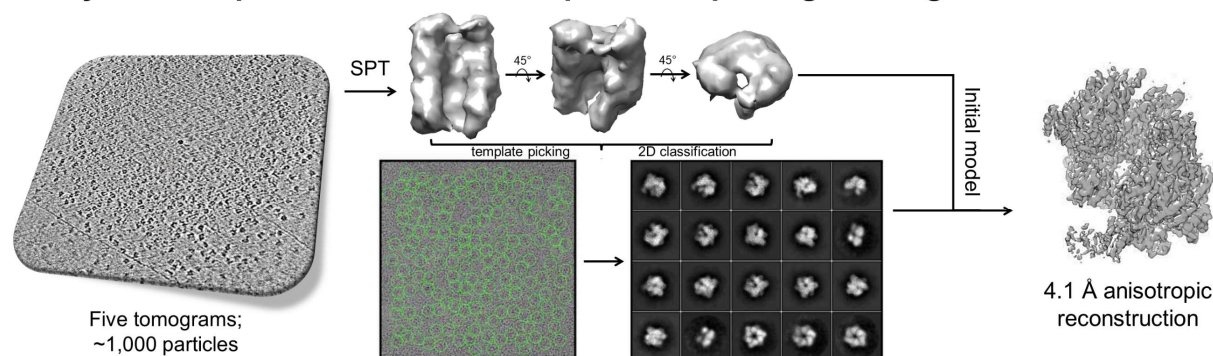

**Figure 8.** A) Gaussian picking of single particle datasets of DNAB helicase-helicase loader was not able to identify lower contrast side-views of particle, which resulted in unreliable initial model generation and stymied efforts to process the datasets further. B) Single particle tomography (SPT) on the same grids used for single particle collection was employed to generate a *de novo* initial model, which was then used both as a template for picking all views of the particle in the single particle micrographs and as an initial model for single particle alignment, resulting in a 4.1 Å anisotropic structure of DNAB helicase-helicase loader (Under Review, Molecular Cell, Submitted Oct 10, 2017). This exemplifies the novelty of applying this potentially crucial fiducial-less SPT workflow on cryoEM grids.

# Videos

Each Video (except for sample #20) shows slice-throughs (with bottom/top oriented as described in the text) of one tomogram from a given sample in Tables 1 & 2 alongside a schematic cross-sectional diagram of the sample and the ice. Most tomograms are oriented such that the plane of one of the particle layers is parallel to the viewing plane. A hole magnification tomogram is shown in the Video for sample #20. The tomograms were rendered with 3dmod from the IMOD package (Kremer et al., 1996) and the schematic particles were rendered with UCSF Chimera (Pettersen et al., 2004).

## Tables

| Sample # | Sample name                                     | Grid Type                | Ice thickness (center, edge, substrate) in nm ± a few nm | # of Layers (center, edge, substrate) | Apparent preferred orientation in layer? | Min. Particle/layer distance from air-water interface (nm ± a few nm) |
|----------|-------------------------------------------------|--------------------------|----------------------------------------------------------|---------------------------------------|------------------------------------------|-----------------------------------------------------------------------|
| 1*       | 32 kDa Kinase                                   | Carbon Spotiton          | (65, 45, --)                                             | (0+, 0+, 0+)                          | Unknown                                  | <5                                                                    |
| 2        | 32 kDa Kinase                                   | Gold Spotiton            | (30, --, --)                                             | (0+, --, --)                          | Unknown                                  | <5                                                                    |
| 3        | Insulin Receptor                                | Gold Spotiton            | (55, --, --)                                             | (1-2, --, --)                         | No                                       | 5                                                                     |
| 4**      | Hemagglutinin                                   | Carbon Spotiton          | (25-95, 100-210, --)                                     | (0 or 2, 2, --)                       | Some                                     | 5                                                                     |
| 5*       | HIV-1 Trimer Complex 1                          | Carbon Spotiton          | (75-210, --, --)                                         | (2+, --, --)                          | Yes                                      | 5-10                                                                  |
| 6*       | HIV-1 Trimer Complex 1                          | Gold Spotiton            | (20, --, --)                                             | (1, --, --)                           | Some                                     | 5                                                                     |
| 7*       | HIV-1 Trimer Complex 2                          | Carbon Spotiton          | (190, 265, --)                                           | (2, 2, 2+)                            | Yes                                      | 5                                                                     |
| 8        | 147 kDa Kinase                                  | Gold Spotiton            | (15, --, --)                                             | (1, --, --)                           | Unknown                                  | <5                                                                    |
| 9        | 150 kDa Protein                                 | Holey Carbon Spotiton    | (35, 70, --)                                             | (1, 2, --)                            | Some                                     | <5                                                                    |
| 10*      | Stick-like Protein 1                            | Carbon Spotiton          | (80, --, --)**                                           | (1, --, --)                           | No                                       | <5                                                                    |
| 11       | Stick-like Protein 2 (150 kDa)                  | Carbon CFlat             | (100, 100, --)**                                         | (1, 1, --)                            | Unknown                                  | 5                                                                     |
| 12*      | Stick-like Protein 2                            | Gold Spotiton            | (135-190, --, --)**                                      | (1, --, --)                           | Some                                     | 5                                                                     |
| 13*      | Neural Receptor                                 | Carbon Spotiton          | (60-90, --, --)**                                        | (1, --, --)                           | Yes                                      | 5                                                                     |
| 14*      | Neural Receptor                                 | Carbon Spotiton          | (80-90, 100-140, 135)**                                  | (1, 1, 1)                             | Yes                                      | 5                                                                     |
| 15       | 200kDa Protein                                  | CFlat Carbon + Gold mesh | (40-60, 95, 110)                                         | (1, 1, 2)                             | No                                       | 5                                                                     |
| 16       | Small, Popular Protein                          | Carbon Spotiton          | (30, 70, --)                                             | (1, 2, 2)                             | No                                       | 5                                                                     |
| 17*      | Glycoprotein with Bound Lipids (deglycosylated) | Carbon Spotiton          | (15, 90, 130)                                            | (1, 2, 2)                             | Yes                                      | <5                                                                    |
| 18       | Glycoprotein with Bound Lipids (glycosylated)   | Gold Spotiton            | (155, --, --)**                                          | (2, --, --)                           | Some                                     | <5                                                                    |
| 19*      | Lipo-protein                                    | Holey Carbon             | (0-95, 85-100, --)                                       | Uniformly distributed in ice          | Unknown                                  | 5                                                                     |
| 20*      | GPCR                                            | Carbon Spotiton          | (25, --, --)                                             | (1, 2, --)                            | No                                       | 5                                                                     |
| 21**     | Rabbit Muscle Aldolase (1mg/ml)                 | Gold Spotiton            | (15, 50, --)                                             | (1, 2, --)                            | No                                       | <5                                                                    |
| 22**     | Rabbit Muscle Aldolase (6mg/ml)                 | Carbon Spotiton          | (60-110, 75-130, 85)                                     | (2+, 2+, 2)                           | Some                                     | 5                                                                     |
| 23       | Un-named Protein                                | Holey Carbon             | (35, --, 60)                                             | (1, --, 2)                            | Yes                                      | 5                                                                     |

  

| Sample # | Sample name                                    | Grid Type             | Ice thickness (center, edge, substrate) in nm ± a few nm | # of Layers (center, edge, substrate) | Apparent preferred orientation in layer? | Min. Particle/layer distance from air-water interface (nm ± a few nm) |
|----------|------------------------------------------------|-----------------------|----------------------------------------------------------|---------------------------------------|------------------------------------------|-----------------------------------------------------------------------|
| 24       | Un-named Protein                               | Carbon Spotiton       | (35, 110, --)                                            | (1, 2, --)                            | Yes                                      | 5                                                                     |
| 25*      | Protein in Nanodisc (0.58 mg/ml)               | Gold Spotiton         | (30, 65, --)                                             | (1-2, 2, --)                          | No                                       | 5-10                                                                  |
| 26       | IDE                                            | Carbon Spotiton       | (25, 60, 95)                                             | (1, 2, 2)                             | Unknown                                  | 5                                                                     |
| 27*      | IDE                                            | Gold Spotiton         | (40, --, --)                                             | (1, --, --)                           | No                                       | 5-10                                                                  |
| 28       | Small, Helical Protein                         | Gold Spotiton         | (50, 75, --)                                             | (1, 2, --)                            | Some                                     | 5                                                                     |
| 29       | 300 kDa Protein                                | Carbon Spotiton       | (30, 100, --)                                            | (1, 2, 2)                             | No                                       | 5                                                                     |
| 30**     | GDH                                            | Holey Carbon          | (30, 85, 100)                                            | (1, 1+, 3+)                           | Some                                     | 5                                                                     |
| 31**     | GDH                                            | Holey Carbon          | (60, 120, 140)                                           | (1, 2+, 3+)                           | Yes                                      | 5                                                                     |
| 32**     | GDH (2.5 mg/ml) + 0.001% DDM                   | Carbon Spotiton       | (50, 180, 190)                                           | (1-1+, 2+, --)                        | Yes                                      | <5                                                                    |
| 33**     | DNAH Helicase-helicase Loader                  | Quantifoil            | (50-55, 80-100, --)                                      | (1+, 2, --)                           | No                                       | 5                                                                     |
| 34**     | Apoferritin                                    | Gold Spotiton         | (25-30, --, --)                                          | (1, --, --)                           | No                                       | 5                                                                     |
| 35**     | Apoferritin                                    | Gold Spotiton         | (25, --, --)                                             | (1, --, --)                           | No                                       | 5                                                                     |
| 36**     | Apoferritin                                    | Holey Carbon Spotiton | (30, 125, 135)                                           | (1, 2, 2+)                            | No                                       | 5                                                                     |
| 37**     | Apoferritin (1.25 mg/ml)                       | Holey Carbon Spotiton | (30-50, 100, 105)                                        | (1, 2+, 2)                            | No                                       | 5                                                                     |
| 38**     | Apoferritin (0.5 mg/ml)                        | Holey Gold Spotiton   | (25-30, 55, --)                                          | (1, 2, --)                            | No                                       | <5                                                                    |
| 39**     | Apoferritin with 0.5 mM TCEP                   | Carbon Spotiton       | (40-90, 145-175, --)                                     | (1-2, 2+, 1)                          | No                                       | 5                                                                     |
| 40       | Protein with Carbon Over Holes                 | Carbon Quantifoil     | (110, 70-100, --)                                        | (1+, 1+, --)                          | Some                                     | 5-10                                                                  |
| 41       | Protein and DNA Strands with Carbon Over Holes | Carbon Quantifoil     | (60, --, --)                                             | (1+, --, --)                          | Some                                     | 5-10                                                                  |
| 42**     | T20S Proteasome                                | Holey Carbon          | (35, 115, 120)                                           | (1, 2+, 3+)                           | Some                                     | <5                                                                    |
| 43**     | T20S Proteasome                                | Holey Carbon          | (125, 140-160, 150)                                      | (2+, 2+, 2+)                          | Some                                     | 5                                                                     |
| 44**     | T20S Proteasome                                | Gold Quantifoil       | (50-75, --, --)                                          | (1+, --, --)                          | Some                                     | 5                                                                     |
| 45**     | Mtb 20S Proteasome                             | Carbon Spotiton       | (35, 80, 115)                                            | (0, 1+, 1)                            | No                                       | 5-10                                                                  |
| 46       | Protein on Streptavidin                        | Holey Carbon          | (20-100, 80-120, --)                                     | (0-2, 1-2, --)                        | No                                       | 10                                                                    |

\* A video is included for this sample.  
 \* A dataset is deposited for this sample.  
 \*\* Intentionally thick ice.

**Table 1.** Ice thickness measurements, number of particle layers, preferred orientation estimation, and distance of particle layers from the air-water interface as determined by cryoET of single particle cryoEM grids for 46 grid preparations of different samples. The table is ordered in approximate order of increasing particle mass. Several particles are un-named as they are yet to be published. Sample concentration in solution is included with the sample name if known. Distance measurements are measured with an accuracy of a few nanometers due to binning of the tomograms by a factor of 4 and estimation of air-water interface locations using either contamination or particle layers. Grid types include carbon and gold holey grids and lacey and holey nanowire grids, plunged using conventional methods or with Spotiton. Edge measurements are made ~100 nm away from hole edges. '+' indicates that there are free-floating proteins; ie. proteins not local to the air-water interfaces. '--' indicates that these values were not measurable. Samples highlighted with blue contain regions of ice with near-ideal conditions (<100 nm ice, no overlapping particles, little or no preferred orientation). Samples highlighted with green contain regions of ice with ideal conditions (non-ideal plus no particle-air-water interface interactions). Incubation time for the samples on the grid before plunging is on the order of 1 second or longer.



| Sample # | Sample name                                   | Air-water interface, particle behavior, and layer/ice angle (bottom, center) | Air-water interface, particle behavior, and layer/ice angle (bottom, edge) | Ice behavior (bottom) | Air-water interface, particle behavior, and layer/ice angle (top, center) | Air-water interface, particle behavior, and layer/ice angle (top, edge) | Ice behavior (top) | Notes                                                                                    |
|----------|-----------------------------------------------|------------------------------------------------------------------------------|----------------------------------------------------------------------------|-----------------------|---------------------------------------------------------------------------|-------------------------------------------------------------------------|--------------------|------------------------------------------------------------------------------------------|
| 1*       | 32 kDa Kinase                                 | A, B1 or B2 or B3 (50%), 4°                                                  | A, B1 or B2 or B3 (50%), 10°                                               | C2                    | A, B1 or B2 or B3 (50%), 10°                                              | A, B1 or B2 or B3 (50%), 10°                                            | C2                 | Particles aggregate into clouds. Gold beads are glow discharge contamination.            |
| 2        | 32 kDa Kinase                                 | A, B1 or B2 or B3 (50%), 4.8°                                                | —                                                                          | C1 or C2              | A, B1 or B2 or B3 (50%), 4.8°                                             | —                                                                       | C1 or C2           | Gold beads are glow discharge contamination.                                             |
| 3        | Insulin Receptor                              | A, B1 or B2 or B3 (100%), 3-5°                                               | —                                                                          | C2 or C3              | A, B1 or B2 or B3 (100%), 3-5°                                            | —                                                                       | C2 or C3           | Where very thin ice in the center of holes excludes particles. Protein fragments remain. |
| 4*       | Hemagglutinin                                 | A2, No particles, 3-7°                                                       | A, B3 (40%), 5° or A, B3 (40%), 3°                                         | C3 or C4              | A2, No particles, 3-7° or A, B3 (50%), 7°                                 | A, B3 (50%), 5-7°                                                       | C3 or C4           | Trimer domains and/or unbound receptors are adsorbed to air-water interfaces.            |
| 5*       | HIV-1 Trimer Complex 1                        | A2, B1, B3 (30%), 1-5°                                                       | —                                                                          | C1, C2, or C3         | A2, B1, B3 (30%), 1-5°                                                    | —                                                                       | C1, C2, or C3      | Trimer domains and/or unbound receptors are adsorbed to air-water interfaces.            |
| 6*       | HIV-1 Trimer Complex 1                        | A2, B3 (80%), 6°                                                             | —                                                                          | C2                    | A2, B3 (80%), 6°                                                          | —                                                                       | C2                 | Gold beads are glow discharge contamination.                                             |
| 7*       | HIV-1 Trimer Complex 2                        | A, B2 or B3 (50%), 1°                                                        | A, B2 or B3 (50%), 3°                                                      | C1 or C2              | A, B2 or B3 (70%), 1°                                                     | A, B2 or B3 (70%), 3°                                                   | C1 or C2           | Gold beads are glow discharge contamination.                                             |
| 8        | 147 kDa Kinase                                | A, B2 or B3 (50%), 0°                                                        | —                                                                          | C2 or C3              | A, B2 or B3 (50%), 0°                                                     | —                                                                       | C2 or C3           | Gold beads are glow discharge contamination.                                             |
| 9        | 150 kDa Protein                               | A, B2 or B3 (60%), 7-10°                                                     | A, B2 or B3 (60%), 8°                                                      | C2 or C3              | A, B2 or B3 (60%), 8°                                                     | A, B2 or B3 (40%), 9°                                                   | C2 or C3           |                                                                                          |
| 10*      | Stick-like Protein 1                          | A2, B4 and B5 (1%), 10°                                                      | —                                                                          | C2                    | A2, B4 and B5 (50%), 10°                                                  | —                                                                       | C2                 | Determinations are not accurate due to over focusing and minimal tilt angles.            |
| 11       | Stick-like Protein 2 (150 kDa)                | A2, B3 and B4 and B5 (70%), 7°                                               | A2, B3 and B4 and B5 (70%), 7°                                             | —                     | A2, B3 and B4 and B5 (70%), 7°                                            | —                                                                       | —                  | Note 1. Note 2.                                                                          |
| 12*      | Stick-like Protein 2                          | A2, B3 (1%), 0°                                                              | —                                                                          | C2 or C3              | A2, B3 (1%), 0°                                                           | —                                                                       | C2 or C3           | Note 1. Note 2.                                                                          |
| 13*      | Neural Receptor                               | A2, B3 (80%), 3-10°                                                          | —                                                                          | C2 or C3              | A2, No particles, 3-10°                                                   | —                                                                       | C2 or C3           | Note 1. Note 2.                                                                          |
| 14*      | Neural Receptor                               | —                                                                            | A2, No particles, 2-7° or A2, B3 (70%), 5°                                 | C3                    | —                                                                         | A2, B3 (70%), 7° or A2, No particles, 7°                                | C3                 | Note 1. Note 2. Two tomograms have one orientation, one has the opposite.                |
| 15       | 200kDa Protein                                | A, B2 or B3 (50%), 2°                                                        | A, B2 or B3 (50%), 4°                                                      | C3                    | No particles or A, B2 or B3 (50%), 2°                                     | A, No particles, 11°                                                    | C3                 |                                                                                          |
| 16       | Small, Popular Protein                        | A, B2 or B3 (90%), 6°                                                        | A, B2 or B3 (90%), 9°                                                      | C2                    | A, B2 or B3 (90%), 6°                                                     | A, B2 or B3 (90%), 1°                                                   | C3                 |                                                                                          |
| 17*      | Glycoprotein with Bound Lipids (glycosylated) | A, B3 (10%), 4°                                                              | A, B3 (80%), 10°                                                           | C3                    | A, B3 (10%), 4°                                                           | A, B3 (80%), 11°                                                        | C3                 | Lipid membrane dissociates from protein in center.                                       |
| 18       | Glycoprotein with Bound Lipids (glycosylated) | A, B3 (50%), 10°                                                             | —                                                                          | C2 or C3              | A, B3 (50%), 4°                                                           | —                                                                       | C2 or C3           |                                                                                          |
| 19*      | Lipo protein                                  | No particles or A, B2, 3°                                                    | A, B3, 11°                                                                 | C3, C4                | No particles or A, B2, 5°                                                 | A, B3, 11°                                                              | C3, C4             | Particles are uniformly distributed in the ice.                                          |
| 20*      | GPCR                                          | A, B2 or B3 (70%), 3°                                                        | A, B2 or B3 (60%), —                                                       | C3                    | A, B2 or B3 (70%), 3°                                                     | A, B2 or B3 (60%), —                                                    | C3                 |                                                                                          |
| 21*      | Rabbit Muscle Aldolase (Emp/ins)              | A, B2 or B3 (90%), 3-9°                                                      | A, B2 or B3 (90%), 6°                                                      | C3                    | A, B2 or B3 (90%), 3-9°                                                   | A, B2 or B3 (90%), 10°                                                  | C3                 |                                                                                          |
| 22*      | Rabbit Muscle Aldolase (mg/ml)                | A, B1, B2 or B3 (90%), 5°                                                    | A, B1, B2 or B3 (90%), 5°                                                  | C2 or C3              | A, B1, B2 or B3 (90%), 5°                                                 | A, B1, B2 or B3 (90%), 5°                                               | C2 or C3           |                                                                                          |
| 23       | Un-named Protein                              | A, B3 (40%), 0-3°                                                            | —                                                                          | C2 or C3              | A, B3 (40%), 0-3°                                                         | —                                                                       | C2 or C3           |                                                                                          |

\* A video is included for sample.  
† A dataset is deposited for sample.  
Note 1: Apparent protein fragments/domains are adsorbed to the air-water interfaces.  
Note 2: Partial particles exist.  
Note 3: Free-floating particles make contact with particle layer.

**Table 2.** Apparent air-water interface, particle, and ice behavior of the same samples in Table 1 using the descriptions in Figure 1. Tilt-series were aligned and reconstructed using the same workflow and thus are oriented in the same direction. However, the direction relative to the sample application is not known. The bottom air-water interface corresponds to lower z-slice values, and the top to higher z-slice values as rendered in 3dmod from the IMOD package (Kremer et al., 1996). ‘A’ means that the air-water interface is apparently clean and cannot be visually differentiated between A1, A2 (primary structure), or A3. Percentages in parentheses are particle layer saturation estimates. Reported angles are the angles (absolute value) between the particle layer’s normal and the electron beam direction, measured using ‘Slicer’ in 3dmod. It is often difficult to distinguish between flat and curved ice at the air-water interfaces (e.g. Figure 2, ‘C1 or C2’ or ‘C2 or C3’) because most fields of view do not span entire holes. ‘†’ indicates that the top layer of objects is the same layer as the bottom layer. ‘--’ indicates that these values were not measurable.
